# Supplementary material for: Health behaviours and mental and physical health status in older adults with a history of homelessness: a cross-sectional population-based study in England
Source: PubMed Central journal article supplement (PMC6585828; doi:10.1136/bmjopen-2018-028003), 2019-06-14
Supplement: bmjopen-2018-028003.draft_revisions.pdf [file bmjopen-2018-028003.draft_revisions.pdf]

# BMJ Open

BMJ Open is committed to open peer review. As part of this commitment we make the peer review history of every article we publish publicly available.

When an article is published we post the peer reviewers' comments and the authors' responses online. We also post the versions of the paper that were used during peer review. These are the versions that the peer review comments apply to.

The versions of the paper that follow are the versions that were submitted during the peer review process. They are not the versions of record or the final published versions. They should not be cited or distributed as the published version of this manuscript.

BMJ Open is an open access journal and the full, final, typeset and author-corrected version of record of the manuscript is available on our site with no access controls, subscription charges or pay-per-view fees (<http://bmjopen.bmj.com>).

If you have any questions on BMJ Open's open peer review process please email [info.bmjopen@bmj.com](mailto:info.bmjopen@bmj.com)

# BMJ Open

## Health behaviours and mental and physical health status in older adults with a history of homelessness: a population-based study

|                               |                                                                                                                                                                                                                                                                                                                                                                                                                                                                                                                                                                                                                                                                                                                                                                                                                                                               |
|-------------------------------|---------------------------------------------------------------------------------------------------------------------------------------------------------------------------------------------------------------------------------------------------------------------------------------------------------------------------------------------------------------------------------------------------------------------------------------------------------------------------------------------------------------------------------------------------------------------------------------------------------------------------------------------------------------------------------------------------------------------------------------------------------------------------------------------------------------------------------------------------------------|
| Journal:                      | <i>BMJ Open</i>                                                                                                                                                                                                                                                                                                                                                                                                                                                                                                                                                                                                                                                                                                                                                                                                                                               |
| Manuscript ID                 | bmjopen-2018-028003                                                                                                                                                                                                                                                                                                                                                                                                                                                                                                                                                                                                                                                                                                                                                                                                                                           |
| Article Type:                 | Research                                                                                                                                                                                                                                                                                                                                                                                                                                                                                                                                                                                                                                                                                                                                                                                                                                                      |
| Date Submitted by the Author: | 19-Nov-2018                                                                                                                                                                                                                                                                                                                                                                                                                                                                                                                                                                                                                                                                                                                                                                                                                                                   |
| Complete List of Authors:     | Smith, Lee; Anglia Ruskin University, Department of Life Sciences<br>Veronese, Nicola; National Research Council, Neuroscience Institute, Aging Branch<br>López-Sánchez, Guillermo Felipe; Faculty of Sport Sciences, University of Murcia<br>Moller, Eloise ; The Single Homeless Project<br>Johnstone, James ; The Cambridge Centre for Sport and Exercise Sciences, Anglia Ruskin University<br>Firth, Joseph ; NICM Health Research Institute, Western Sydney University<br>Grabovac, Igor; Centre for Public Health, Medical University of Vienna, Department of Social and Preventive Medicine<br>Yang, Lin; Medical University of Vienna, Epidemiology<br>Soysal, Pinar; Faculty of Medicine, Bezmialem Vakif University, Department of Geriatric Medicine<br>Jackson, Sarah ; University College London, Department of Behavioural Science and Health |
| Keywords:                     | Homelessness, physical health, MENTAL HEALTH, health behaviour, older adults                                                                                                                                                                                                                                                                                                                                                                                                                                                                                                                                                                                                                                                                                                                                                                                  |
|                               |                                                                                                                                                                                                                                                                                                                                                                                                                                                                                                                                                                                                                                                                                                                                                                                                                                                               |

SCHOLARONE™  
Manuscripts

# Health behaviours and mental and physical health status in older adults with a history of homelessness: a population-based study

Smith L,<sup>1\*</sup> Veronese N,<sup>2</sup> López-Sánchez GF,<sup>3</sup> Moller E,<sup>4</sup> Johnstone J,<sup>5</sup> Firth J,<sup>6</sup> Grabovac I,<sup>7</sup> Yang L,<sup>8</sup> Soysal P,<sup>9</sup> Jackson SE<sup>10\*</sup>

1. The Cambridge Centre for Sport and Exercise Sciences, Anglia Ruskin University, Cambridge. [Lee.Smith@anglia.ac.uk](mailto:Lee.Smith@anglia.ac.uk)
2. National Research Council, Neuroscience Institute, Aging Branch, Padova, Italy. [ilmannato@gmail.com](mailto:ilmannato@gmail.com)
3. Faculty of Sport Sciences, University of Murcia, Spain. [gfls@um.es](mailto:gfls@um.es)
4. The Single Homeless Project, UK, London. [Emoller@shp.org.uk](mailto:Emoller@shp.org.uk)
5. The Cambridge Centre for Sport and Exercise Sciences, Anglia Ruskin University, Cambridge. [james.johnstone@anglia.ac.uk](mailto:james.johnstone@anglia.ac.uk)
6. NICM Health Research Institute, Western Sydney University, Westmead, Australia. [j.firth@westernsydney.edu.au](mailto:j.firth@westernsydney.edu.au)
7. Department of Social and Preventive Medicine, Centre for Public Health, Medical University of Vienna, Vienna, Austria. [igor.grabovac@meduniwien.ac.at](mailto:igor.grabovac@meduniwien.ac.at)
8. Department of Epidemiology, Center for Public Health, Medical University of Vienna, Vienna, Austria. [Lin.yang@muv.ac.at](mailto:Lin.yang@muv.ac.at)
9. Department of Geriatric Medicine, Faculty of Medicine, Bezmialem Vakif University, Istanbul, Turkey. [dr.pinarsoysal@hotmail.com](mailto:dr.pinarsoysal@hotmail.com)
10. Department of Behavioural Science and Health, University College London, London, UK. [s.e.jackson@ucl.ac.uk](mailto:s.e.jackson@ucl.ac.uk)

**\*Corresponding authors:** Dr Sarah E Jackson, PhD. Department of Behavioural Science and Health, University College London, 1-19 Torrington Place, London WC1E 6BT [s.e.jackson@ucl.ac.uk](mailto:s.e.jackson@ucl.ac.uk); and Dr Lee Smith, PhD. Cambridge Centre for Sports and Exercise Sciences, Anglia Ruskin University, Cambridge [lee.smith@anglia.ac.uk](mailto:lee.smith@anglia.ac.uk)

**Word count (excluding title page, abstract, references, figures and tables):** 2726.

## Health behaviours and mental and physical health status in older adults with a history of homelessness: a population-based study

### ABSTRACT

**Objectives:** This study compared (i) levels of engagement in lifestyle risk behaviours and (ii) mental and physical health status in individuals who have previously been homeless to those of individuals who have not. **Design:** Cross-sectional. **Participants:** Data were from participants (n=6,931) of the English Longitudinal Study of Ageing. **Measures:** Participants reported whether they had ever been homeless. We used regression models to analyse associations between homelessness and (i) cigarette smoking, daily alcohol consumption and physical inactivity, adjusting for sociodemographic covariates (age, sex, ethnicity, highest level of education, marital status, and household non-pension wealth), and (ii) self-rated health, limiting long-standing illness, depressive symptoms, life satisfaction, quality of life and loneliness, adjusting for sociodemographics and health behaviours. **Results:** 104 participants (1.5%) reported having been homeless. Individuals who had been homeless were significantly more likely to smoke (OR=1.78, 95% CI 1.14 to 2.78), have a limiting long-standing illness (OR=2.49, 95% CI 1.53 to 4.03) and be depressed (OR=3.30, 95% CI 2.01 to 5.42), and scored lower on measures of life satisfaction (17.34 vs. 19.96,  $p<0.001$ ) and quality of life (39.02 vs. 41.21,  $p=0.013$ ). Rates of daily drinking (27.6% vs. 22.8%,  $p=0.385$ ), physical inactivity (30.7% vs. 23.0%,  $p=0.345$ ), poor self-rated health (41.9% vs. 30.5%,  $p=0.050$ ) and loneliness (27.1% vs. 21.0%,  $p=0.080$ ) were also elevated. **Conclusions:** Those who were once homeless have poorer mental and physical health outcomes and are more likely to engage in lifestyle risk behaviours. Interventions to improve their health and quality of life are required.

**Keywords:** Homelessness, physical health, mental health, health behaviour, older adults.

### Strengths and limitations of this study

- To our knowledge, this is the first study to examine health outcomes in those who have transitioned out of homelessness.
- The very small number of participants with a history of homelessness in our sample meant that analyses were underpowered to detect modest differences between groups.
- However, the fact that we observed significant differences in the majority of the outcomes we analysed attests to the strength of these associations.
- Information on time since the period(s) of homelessness was not available so we were unable to evaluate the extent to which recency of homelessness is related to our outcomes of interest.
- It is possible that participants who reported a history of homelessness had transitioned out of homelessness many years or even decades prior. If this is the case, it demonstrates the long-lasting impact of homelessness across the lifespan.

## INTRODUCTION

Homelessness is a substantial and growing problem in the United Kingdom. The annual homelessness monitor from Crisis and the Joseph Rowntree Foundation showed that in 2015/16 there were 271,000 local authority homelessness case actions in the UK, a rise of 32% since 2009/10.[1] Being homeless, or at risk of homelessness, has been shown to have a detrimental impact upon mental and physical health.[2] A recent systematic review concluded that people who are homeless are at increased risk of respiratory conditions, depression, anxiety, and excess winter mortality, compared to the general population.[3] Homelessness is associated with premature death, with the single homeless at the highest risk with an average age of death at 47 years, some 30 years lower than in the general population.[4]

Increased morbidity and mortality among the homeless may be driven, at least in part, by higher levels of engagement in lifestyle risk behaviours. Data from the USA indicate that while 19.8% of adult Americans smoke, smoking prevalence is over 70% among those who are homeless.[5–8] Levels of physical activity are also low among the homeless. In a Danish study, approximately 70% of homeless individuals reported no participation in any form of exercise.[9] High levels of alcohol consumption and drug use are also common among this population.[10]

Tackling homelessness is an urgent priority, and targeted policies have been actioned in the UK to rehouse those who are homeless. The Homelessness Directorate was established in 2002 in order to assist local authorities in tackling homelessness.[11] Strategies focus on preventing the need for people to sleep rough in the first place, as well as supporting people to move on from homelessness by helping them to address their needs, improving access to health and substance misuse services, and helping them rebuild their lives through education, training and employment.[12] A number of UK charities (e.g. Crisis, Shelter England, The Single Homeless Project) also work to support people who are homeless in acquiring a home and entering back into employment. With such policies and charities in operation, a significant number of individuals are able to transition out of homelessness.

While the evidence base on the health risks associated with homelessness is growing, to our knowledge no studies have explored what happens to the health and wellbeing of people when they are no longer

homeless. Given that lifestyle behaviours tend to track over the life course,[13] and early life exposures can have a substantial impact on later-life health outcomes,[14] it seems likely that the health risks associated with homelessness may persist, at least to some extent, beyond the period of homelessness. The present study aimed to investigate this through a comparison of (i) levels of engagement in lifestyle risk behaviours and (ii) mental and physical health status in individuals who have previously spent a period of time in their lives as homeless to those of individuals who have never been homeless, in a population-based sample of older adults living in England.

## METHODS

### Study population

Data were from the English Longitudinal Study of Ageing (ELSA), a nationally-representative longitudinal panel study of men and women aged 50 and older living in households across England.[15] The study began in 2002, with subsequent rounds of data collection at two-year intervals via computer-assisted personal interview and self-completion questionnaires. Wave 3 (2006/07) included a life history questionnaire, which gathered detailed information about important events that occurred in the participants' lives, including whether they had ever been homeless. Of the 9,771 participants interviewed in Wave 3 of ELSA, 7,855 (80.4%) completed the life history questionnaire. We excluded 924 participants (11.8%) with missing data on homelessness or sociodemographic covariates, leaving a final sample for analysis of 6,931 men and women. Ethical approval was obtained from the National Research Ethics Service and all participants gave full informed consent.

### Patient and Public Involvement

Patients were not involved in the design of this study.

### Measures

#### History of homelessness

Participants were asked whether they had ever been homeless for one month or more (yes/no).

#### Health behaviours

1  
2  
3 Smoking status was assessed with the question “*Do you smoke cigarettes at all nowadays*” (yes/no).  
4  
5

6 Frequency of alcohol intake over the past 12 months was reported on an 8-point scale from “not at all in the  
7 last 12 months” to “almost every day”. We dichotomised responses to distinguish between participants  
8 drinking almost every day (“daily drinking”) vs. less than this.  
9  
10

11 Physical activity was assessed with three items that asked respondents about the frequency with which they  
12 took part in vigorous, moderate and low-intensity activities (more than once a week, once a week, 1-3 times  
13 a month, hardly ever/never)[16]. Responses were dichotomised as follows: inactive (no moderate/vigorous  
14 activity on a weekly basis) vs. active (moderate or vigorous activity at least once a week).  
15  
16  
17  
18

19  
20 Health and wellbeing  
21  
22

23 Self-rated health was assessed using a single item: “*Would you say your health is... very*  
24 *good/good/fair/bad/very bad?*” We analysed the proportion of individuals rating their health as fair, bad or  
25 very bad, as is commonly done in analyses of this variable.[17,18]  
26  
27  
28

29 Limiting long-standing illness was assessed with two questions: (1) “*Do you have any long-standing illness,*  
30 *disability, or infirmity? By long-standing I mean anything that has troubled you over a period of time or that*  
31 *is likely to affect you over a period of time.*” If they responded yes, they were asked (2) “*Does this illness or*  
32 *disability limit your activities in any way?*” Affirmation of a long-standing illness and any form of limitation  
33 classified the participant as having a limiting long-standing illness.  
34  
35  
36  
37

38 Depressive symptoms were assessed with an eight-item version of the Center for Epidemiologic Studies  
39 Depression Scale (CES-D) [19], a scale highly validated for use in older adults [20]. This asks about feelings  
40 over the last week (e.g. “Over the last week have you felt sad”), with binary response options (1=yes, 0=no).  
41 Positively framed items were reverse scored. Data were dichotomised using an established cut-off, with a  
42 score of 4 or higher indicating significant symptomatology.[20]  
43  
44  
45  
46  
47

48 Life satisfaction was assessed with the Satisfaction With Life Scale,[21] which asks respondents to rate the  
49 extent to which they agree with five statements: “*In most ways my life is close to my ideal*”; “*The conditions*  
50 *of my life are excellent*”; “*I am satisfied with my life*”; “*So far I have got the important things I want in life*”;  
51 “*If I could live my life again, I would change almost nothing*” on a scale from 0 (strongly disagree) to 6  
52  
53  
54  
55  
56  
57  
58  
59  
60



1  
2  
3 (strongly agree). Responses are summed to produce a total score between 0 and 30, with higher scores  
4 indicating greater life satisfaction.  
5

6  
7 Quality of life was assessed with the CASP-19,[22] a scale designed to measure quality of life in older  
8 people. Items cover four domains of quality of life; control (e.g. *"I feel that what happens to me is out of my*  
9 *control"*), autonomy (e.g. *"My health stops me from doing things I want to do"*), self-realisation (e.g. *"I feel*  
10 *that life is full of opportunities"*), and pleasure (e.g. *"I enjoy being in the company of others"*). Respondents  
11 are asked how often each statement applies to them (often=0, sometimes=1, not often=2, never=3).  
12 Positively-worded items are reverse scored so that a higher total score indicates higher quality of life (range:  
13 0–57).  
14  
15

16  
17 Loneliness was measured using a three-item short form of the Revised University of California Los Angeles  
18 (UCLA) Loneliness Scale.[23] Participants were asked: *"How often do you feel you lack*  
19 *companionship?"* (hardly ever or never=1, some of the time=2, often=3). Scores ranged from 3 to 9, with  
20 higher scores indicating greater loneliness. They were dichotomised at  $\geq 6$  versus  $< 6$  to indicate high versus  
21 low loneliness.[24]  
22  
23

#### 24 Sociodemographic covariates

25  
26 Participants reported their age, sex, ethnicity (white/non-white), highest level of education (no  
27 qualifications/up to degree/degree or higher), marital status (married/unmarried). Socioeconomic status  
28 was indexed by household non-pension wealth, which has been identified as a particularly sensitive  
29 indicator in this population).[25] Data on wealth were analysed as quintiles calculated across the whole  
30 Wave 3 ELSA sample.  
31

32  
33 Interviewers collected information on age, sex, ethnicity, the highest level of education, marital status and  
34 wealth. For these analyses, ethnicity was categorised as white or non-white. We classified education as low  
35 (no formal qualifications), intermediate (up to degree) or high (degree or higher). Marital status was  
36 categorised as married or unmarried (never married, divorced or widowed). Total wealth (excluding regular  
37 pension payments but including lump sums from private pension that have already been received but not  
38 yet consumed) was defined as financial wealth, physical wealth (such as business wealth, land or jewels)  
39 and housing wealth (primary and secondary residential housing wealth) minus debts. Wealth was  
40 categorised into five equal groups of net total non-pension wealth measured at the benefit unit level (a  
41 benefit unit is a couple or single person along with any dependent children they might have) across all ELSA  
42  
43  
44  
45  
46  
47  
48  
49  
50  
51  
52  
53  
54  
55  
56  
57  
58  
59  
60

participants who took part in Wave 3. Wealth has been identified as a particularly appropriate indicator of SES in this age group.[25]

## Statistical analysis

All analyses were conducted using SPSS version 24. Data were weighted to correct for sampling probabilities and for differential non-response and to calibrate back to the 2011 National Census population distributions for age and sex. The weights accounted for the differential probability of being included in Wave 3 of ELSA and for non-response to the life history interview.

Differences in sociodemographic characteristics of the groups who did and did not report a history of homelessness were tested using independent t-tests for continuous variables and chi-square tests for categorical variables. We used binary logistic regression to analyse associations between history of homelessness and cigarette smoking, daily drinking and physical inactivity, adjusting for sociodemographic covariates. We then used linear regression (for continuous outcomes) and binary logistic regression (for categorical outcomes) to analyse associations between history of homelessness and health and wellbeing, adjusting for sociodemographics and health behaviours. In all models, the reference category was the group without a history of homelessness. A  $p$ -value  $<0.05$  was used to indicate statistical significance.

## RESULTS

### Sample characteristics

Of the 6,931 participants in our sample, 104 (1.5%) reported having been homeless for one month or more and 6,827 (98.5%) had never been homeless for one month or more. Sample characteristics in relation to history of homelessness are summarised in Table 1. On average, participants who had been homeless were significantly younger than those who had not been homeless (60.9 vs. 65.7 years) and a greater proportion were non-white (6.6% vs. 3.1%), unmarried (54.3% vs. 33.8%) and from the lowest quintile of wealth (44.3% vs. 18.9%). A marginally higher proportion of the group who had been homeless were male (53.8% vs. 46.7%) although the difference was not statistically significant ( $p=0.149$ ). There was no significant difference between groups in the highest level of education achieved.

**Table 1** Sample characteristics in relation to history of homelessness

|  | Had not been | Had been |
|--|--------------|----------|
|--|--------------|----------|

|                            | homeless<br>(n=6,827) <sup>1</sup> | homeless<br>(n=104) | p      |
|----------------------------|------------------------------------|---------------------|--------|
| Age (years), mean (SD)     | 65.74 (10.64)                      | 60.94 (8.32)        | <0.001 |
| Sex                        |                                    |                     |        |
| Men                        | 46.7                               | 53.8                | 0.149  |
| Women                      | 53.3                               | 46.2                | -      |
| Ethnicity                  |                                    |                     |        |
| White                      | 96.9                               | 93.4                | 0.042  |
| Non-white                  | 3.1                                | 6.6                 | -      |
| Highest level of education |                                    |                     |        |
| No qualifications          | 32.4                               | 27.4                | 0.541  |
| Below degree               | 52.2                               | 56.6                | -      |
| Degree or higher           | 15.5                               | 16.0                | -      |
| Marital status             |                                    |                     |        |
| Married                    | 66.2                               | 45.7                | <0.001 |
| Unmarried                  | 33.8                               | 54.3                | -      |
| Wealth quintile            |                                    |                     |        |
| 1 (poorest)                | 18.9                               | 44.3                | <0.001 |
| 2                          | 19.5                               | 13.2                | -      |
| 3                          | 20.6                               | 14.2                | -      |
| 4                          | 20.0                               | 16.0                | -      |
| 5 (richest)                | 21.0                               | 12.3                | -      |

<sup>1</sup> Unweighted sample sizes.

All figures are weighted for sampling probabilities and differential non-response.

Values are percentages unless otherwise stated.

SD = standard deviation.

## History of homelessness and health behaviours

Associations between history of homelessness and health behaviours are shown in Table 2. After adjustment for age, sex, ethnicity, education, marital status and wealth, participants who had been homeless had 1.78 times higher odds (95% CI 1.14 to 2.78) of being a smoker than those who had not been homeless (20.2% vs. 15.4%,  $p=0.011$ ). Rates of daily drinking (27.6% vs. 22.8%) and physical inactivity (30.7% vs. 23.0%) were also higher in the group who had been homeless, but differences were not statistically significant.

**Table 2** Associations between history of homelessness and health behaviours

|             | Had not been<br>homeless | Had been<br>homeless | p     |
|-------------|--------------------------|----------------------|-------|
| Smoking     |                          |                      |       |
| % (SE)      | 15.4 (0.4)               | 20.2 (3.3)           | -     |
| OR [95% CI] | 1.00 (Ref)               | 1.78 [1.14; 2.78]    | 0.011 |

|                     |            |                   |       |
|---------------------|------------|-------------------|-------|
| Daily drinking      |            |                   |       |
| % (SE)              | 22.8 (0.5) | 27.6 (4.2)        | -     |
| OR [95% CI]         | 1.00 (Ref) | 1.26 [0.75; 2.13] | 0.385 |
| Physical inactivity |            |                   |       |
| % (SE)              | 23.0 (0.5) | 30.7 (3.7)        | -     |
| OR [95% CI]         | 1.00 (Ref) | 1.24 [0.80; 1.92] | 0.345 |

All figures are weighted for sampling probabilities and differential non-response, and are adjusted for age, sex, ethnicity, education, marital status and wealth.

SE = standard error, OR = odds ratio, CI = confidence interval.

### History of homelessness and health and wellbeing

Associations between history of homelessness and health and wellbeing are summarised in Table 3. After adjustment for sociodemographics and health behaviours, compared to the group who had not been homeless, the group who had been homeless had 2.49 times higher odds (95% CI 1.54 to 4.03) of reporting a limiting long-standing illness (55.8% vs. 33.5%,  $p < 0.001$ ) and 3.30 times higher odds (95% CI 2.01 to 5.42) of depressive symptoms (33.3% vs. 13.0%,  $p < 0.001$ ). The group who had been homeless also scored lower on average on measures of life satisfaction (17.34 vs. 19.96,  $p < 0.001$ ) and quality of life (39.02 vs. 41.21,  $p = 0.013$ ). Rates of fair/bad/very bad self-rated health (41.9% vs. 30.5%) and loneliness (27.1% vs. 21.0%) were higher in the group who had been homeless but these differences did not reach statistical significance (self-rated health  $p = 0.050$ , loneliness  $p = 0.080$ ).

**Table 3** Associations between history of homelessness and health and wellbeing

|                                     | Had not been homeless | Had been homeless | <i>p</i> |
|-------------------------------------|-----------------------|-------------------|----------|
| Fair/bad/very bad self-rated health |                       |                   |          |
| % (SE)                              | 30.5 (0.6)            | 41.9 (4.5)        | -        |
| OR [95% CI]                         | 1.00 (Ref)            | 1.63 [1.00; 2.67] | 0.050    |
| Limiting long-standing illness      |                       |                   |          |
| % (SE)                              | 33.5 (0.6)            | 55.8 (4.7)        | -        |
| OR [95% CI]                         | 1.00 (Ref)            | 2.49 [1.54; 4.03] | <0.001   |
| Depressive symptoms above threshold |                       |                   |          |
| % (SE)                              | 13.0 (0.4)            | 33.3 (3.5)        | -        |
| OR [95% CI]                         | 1.00 (Ref)            | 3.30 [2.01; 5.42] | <0.001   |

1  
2  
3  
4  
5  
6  
7  
8  
9  
10  
11  
12  
13  
14  
15  
16  
17  
18  
19  
20  
21  
22  
23  
24  
25  
26  
27  
28  
29  
30  
31  
32  
33  
34  
35  
36  
37  
38  
39  
40  
41  
42  
43  
44  
45  
46  
47  
48  
49  
50  
51  
52  
53  
54  
55  
56  
57  
58  
59  
60

|                   |             |                      |        |
|-------------------|-------------|----------------------|--------|
| Life satisfaction |             |                      |        |
| Mean score (SE)   | 19.96 (0.1) | 17.34 (0.7)          | -      |
| Coeff. [95% CI]   | Ref         | -2.78 [-4.18; -1.37] | <0.001 |
| Quality of life   |             |                      |        |
| Mean score (SE)   | 41.21 (0.1) | 39.02 (0.9)          | -      |
| Coeff. [95% CI]   | Ref         | -2.25 [-4.03; -0.47] | 0.013  |
| High loneliness   |             |                      |        |
| % (SE)            | 21.0 (0.5)  | 27.1 (4.2)           | -      |
| OR [95% CI]       | 1.00 (Ref)  | 1.56 [0.95; 2.56]    | 0.080  |

All figures are weighted for sampling probabilities and differential non-response, and are adjusted for age, sex, ethnicity, education, marital status, wealth, smoking status, alcohol intake and physical activity.

SE = standard error, OR = odds ratio, CI = confidence interval, Coeff = coefficient.

Possible scores on the quality of life scale range from 0-57, and on life satisfaction scale range from 0-30.

## DISCUSSION

In the present analyses, a total of 104 participants reported having been homeless for one month or more. Those who reported a history of homelessness had a significantly higher odds of smoking than those who had not been homeless and were more likely to drink daily and were inactive but these did not reach significance. Importantly, those who had reported being homeless had a higher odds of reporting limiting long-standing illness and depressive symptoms and scored lower on measures of life satisfaction and quality of life. Taken together, these data suggest that people who transition out of homelessness are at increased risk of partaking in unhealthy behaviour and suffer poorer mental and physical health.

Most smokers find it difficult to quit using tobacco because they are addicted to nicotine.[26] In addition, smoking behaviour is maintained through social networks, such that smokers with social connections who also smoke are less likely to quit.[27] This may be particularly important for people who have been homeless as stigmatised groups may be less able to afford losing the few social connections they have. Considering a very high proportion of homeless people smoke, it is unsurprising that a high proportion continue to smoke when they transition out of homelessness. Moreover, current policies and interventions targeting the homeless tend to focus on behaviours that prevent a successful transition back into society, including drug use and a high alcohol intake, with less emphasis on cigarette smoking. Given the plethora of detrimental consequences of cigarette smoking for both physical and mental health,[28,29] there is a need for targeted smoking cessation interventions for this population.

1  
2  
3 The novel finding that people who have ever been homeless are at increased risk of adverse physical and  
4 mental health outcomes is important. This suggests that the transition from homelessness is not enough to  
5 bring the health profile of this population in alignment with the general public. There are several factors  
6 that may account for the observed disparity in health. First, depression is prevalent among the homeless  
7 community [30] and is a highly recurrent disorder, [31] thus is likely to reoccur after the transition out of  
8 homelessness, with significant personal consequences.[31] Low mood may be partly driving the observed  
9 negative associations with life satisfaction, quality of life, and limiting-long standing illness.

10 [32]Interestingly, smoking has been shown to lead to depression,[28] and the present study and others [5–  
11 7] have documented particularly high prevalence of smoking in the homeless or ex-homeless population.

12  
13  
14  
15  
16  
17  
18  
19 Second, people who are homeless are susceptible to multiple health complications. Chronic hepatitis C and  
20 co-infections are common among the homeless population.[33] Other conditions that are prevalent among  
21 the homeless include tuberculosis, uncontrolled asthma, and dermatologic infestations.[34] These problems  
22 are compounded by high rates of drug and alcohol abuse and together likely contribute to limiting-long  
23 standing illness and lower quality of life across the lifespan.[35,36]

24  
25  
26  
27  
28  
29 To our knowledge, this is the first study to examine health outcomes in those who have transitioned out of  
30 homelessness. While these findings are important for advancing the evidence base in this area, they should  
31 be considered in light of a couple of limitations. The very small number of participants with a history of  
32 homelessness in our sample meant that analyses were underpowered to detect modest differences  
33 between groups. However, the fact that we observed significant differences in the majority of the outcomes  
34 we analysed attests to the strength of these associations. Information on time since the period(s) of  
35 homelessness was not available so we were unable to evaluate the extent to which recency of  
36 homelessness is related to our outcomes of interest. It is possible that participants who reported a history  
37 of homelessness had transitioned out of homelessness many years or even decades prior. If this is the case,  
38 it demonstrates the long-lasting impact of homelessness across the lifespan.

## 39 40 41 42 43 44 45 46 CONCLUSION

47  
48  
49 In conclusion, the present results indicate that older adults in England who have previously been homeless  
50 are more likely to engage in lifestyle risk behaviours and have poorer mental and physical health outcomes  
51 than those who have never been homeless. Whereas continued initiatives to tackle homelessness itself is  
52 important, it is also crucial to consider that even those who have transitioned from homelessness continue  
53  
54  
55  
56  
57  
58  
59  
60

1  
2  
3 to be at much higher risk of adverse health behaviours and poor well-being. Therefore, targeted  
4 interventions are required to improve health outcomes and quality of life in this population.  
5  
6  
7  
8  
9

10 **Authors Contributions:** Study concept and design: LS and SEJ. Analysis and interpretation of data: LS and  
11 SEJ. Drafting of the manuscript: All authors. Critical revision of the manuscript for important intellectual  
12 content: All authors  
13  
14

15  
16  
17  
18 **Conflicts of Interest:** None declared.  
19

20 **Funding:** This research did not receive any funding from agencies in the public, commercial, or not-for-profit  
21 sectors.  
22  
23

24  
25 **Ethics:** Ethical approval was obtained from the National Research Ethics Service and all participants gave full  
26 informed consent.  
27  
28

29 **Data sharing:** No additional data available.  
30  
31

## 32 REFERENCES

33  
34

- 35 1 Fitzpatrick S, Pawson H, Bramley G, *et al*. The homelessness monitor: England 2017. Institute for Social  
36 Policy, Environment and Real Estate (I-SPHERE), Heriot-Watt University; City Futures Research Centre,  
37 University of New South Wales. London: Crisis 2017.  
38
- 39 2 Adebowale V. There is no excuse for homelessness in Britain in 2018. *BMJ* 2018;360:k902.  
40 doi:10.1136/bmj.k902  
41
- 42 3 Thomson H, Thomas S, Sellstrom E, *et al*. Housing improvements for health and associated socio-  
43 economic outcomes. *Cochrane Database Syst Rev* 2013;CD008657.  
44 doi:10.1002/14651858.CD008657.pub2  
45
- 46 4 Crisis. 2011. *Homelessness: A Silent Killer*. [https://www.crisis.org.uk/ending-  
47 homelessness/homelessness-knowledge-hub/health-and-wellbeing/homelessness-a-silent-killer-2011/  
48 \(accessed 11 Oct 2018\)](https://www.crisis.org.uk/ending-homelessness/homelessness-knowledge-hub/health-and-wellbeing/homelessness-a-silent-killer-2011/).  
49
- 50 5 Kermode M, Crofts N, Miller P, *et al*. Health indicators and risks among people experiencing  
51 homelessness in Melbourne, 1995-1996. *Aust N Z J Public Health* 1998;22:464-70.  
52
- 53 6 Fischer PJ, Breakey WR. The epidemiology of alcohol, drug, and mental disorders among homeless  
54 persons. *Am Psychol* 1991;46:1115-28.  
55  
56  
57  
58  
59  
60

- 1
  - 2
  - 3
  - 4
  - 5
  - 6
  - 7
  - 8
  - 9
  - 10
  - 11
  - 12
  - 13
  - 14
  - 15
  - 16
  - 17
  - 18
  - 19
  - 20
  - 21
  - 22
  - 23
  - 24
  - 25
  - 26
  - 27
  - 28
  - 29
  - 30
  - 31
  - 32
  - 33
  - 34
  - 35
  - 36
  - 37
  - 38
  - 39
  - 40
  - 41
  - 42
  - 43
  - 44
  - 45
  - 46
  - 47
  - 48
  - 49
  - 50
  - 51
  - 52
  - 53
  - 54
  - 55
  - 56
  - 57
  - 58
  - 59
  - 60
- 7 Connor SE, Cook RL, Herbert MI, *et al.* Smoking cessation in a homeless population: there is a will, but is there a way? *J Gen Intern Med* 2002;17:369–72.
- 8 Centers for Disease Control and Prevention (CDC). Cigarette smoking among adults-United States, 2007. *MMWR Morb Mortal Wkly Rep* 2008;57:1221–6.
- 9 Pedersen P, Christensen AI, Hess U, *et al.* Susydsat-sundhedsproil for social udsatte I Danmark 2007. Copenhagen: Radet for socialt udsatte 2008.
- 10 O’Toole TP, Gibbon JL, Hanusa BH, *et al.* Self-Reported Changes in Drug and Alcohol Use After Becoming Homeless. *Am J Public Health* 2004;94:830–5. doi:10.2105/AJPH.94.5.830
- 11 Office of the Deputy Prime Minister. Select Committee on Office of the Deputy Prime Minister: Housing, Planning, Local Government and the Regions Written Evidence: Memorandum by the Office of the Deputy Prime Minister (HOM 53). 2004. <https://publications.parliament.uk/pa/cm200304/cmselect/cmodpm/1116/1116we56.htm> (accessed 11 Oct 2018).
- 12 Jones A, Pleace N. Review of single homelessness in the uk 2000-2010. Br. Libr. 2010. <http://www.bl.uk/collection-items/review-of-single-homelessness-in-the-uk-20002010> (accessed 11 Oct 2018).
- 13 Malina RM. Tracking of physical activity and physical fitness across the lifespan. *Res Q Exerc Sport* 1996;67:S48-57.
- 14 Ben-Shlomo Y, Mishra G, Kuh D. Life Course Epidemiology. In: Ahrens W, Pigeot I, eds. *Handbook of Epidemiology*. New York, NY: Springer New York 2014. 1521–49. doi:10.1007/978-0-387-09834-0\_56
- 15 Steptoe A, Breeze E, Banks J, *et al.* Cohort profile: the English Longitudinal Study of Ageing. *Int J Epidemiol* 2013;42:1640–8. doi:10.1093/ije/dys168
- 16 Demakakos P, Hamer M, Stamatakis E, *et al.* Low-intensity physical activity is associated with reduced risk of incident type 2 diabetes in older adults: evidence from the English Longitudinal Study of Ageing. *Diabetologia* 2010;53:1877–85. doi:10.1007/s00125-010-1785-x
- 17 Steptoe A, Jackson SE. The Life Skills of Older Americans: Association with Economic, Psychological, Social, and Health Outcomes. *Sci Rep* 2018;8:9669. doi:10.1038/s41598-018-27909-w
- 18 DeSalvo KB, Bloser N, Reynolds K, *et al.* Mortality prediction with a single general self-rated health question. A meta-analysis. *J Gen Intern Med* 2006;21:267–75. doi:10.1111/j.1525-1497.2005.00291.x
- 19 Radloff LS. The CES-D scale. *Appl Psychol Meas* 1977;1:385–401.
- 20 Steffick DE. Documentation of affective functioning measures in the Health and Retirement Study. 2000.
- 21 Diener E, Emmons RA, Larsen RJ, *et al.* The satisfaction with life scale. *J Assess* 1985;49:71–75.



- 1  
2  
3 22 Hyde M, Wiggins RD, Higgs P, *et al.* A measure of quality of life in early old age: the theory,  
4 development and properties of a needs satisfaction model (CASP-19). *Aging Ment Health* 2003;7:186–  
5 194.  
6  
7 23 Russell DW. UCLA Loneliness Scale (Version 3): reliability, validity, and factor structure. *J Pers Assess*  
8 1996;66:20–40. doi:10.1207/s15327752jpa6601\_2  
9  
10 24 Steptoe A, Shankar A, Demakakos P, *et al.* Social isolation, loneliness, and all-cause mortality in older  
11 men and women. *Proc Natl Acad Sci U S A* 2013;110:5797–801. doi:10.1073/pnas.1219686110  
12  
13 25 Banks J, Karlsen S, Oldfield Z. Socio-economic position. Published Online First: 2003.  
14 <http://discovery.ucl.ac.uk/15366/1/15366.pdf> (accessed 4 Mar 2014).  
15  
16 26 Lynch BS, Bonnie RJ. *The nature of nicotine addiction*. National Academies Press (US) 1994.  
17 <https://www.ncbi.nlm.nih.gov/books/NBK236759/> (accessed 11 Oct 2018).  
18  
19 27 Christakis NA, Fowler JH. The collective dynamics of smoking in a large social network. *N Engl J Med*  
20 2008;358:2249–58. doi:10.1056/NEJMsa0706154  
21  
22 28 Stubbs B, Vancampfort D, Firth J, *et al.* Association between depression and smoking: A global  
23 perspective from 48 low- and middle-income countries. *J Psychiatr Res* 2018;103:142–9.  
24 doi:10.1016/j.jpsychires.2018.05.018  
25  
26 29 Sherratt FC, Field JK, Marcus MW. Association between smoking and health outcomes in an  
27 economically deprived population: the Liverpool Lung Project. *J Epidemiol Community Health*  
28 2017;71:806–10. doi:10.1136/jech-2016-208730  
29  
30 30 Bassuk EL, Beardslee WR. Depression in homeless mothers: Addressing an unrecognized public health  
31 issue. *Am J Orthopsychiatry* 2014;84:73–81. doi:10.1037/h0098949  
32  
33 31 Burcusa SL, Iacono WG. Risk for Recurrence in Depression. *Clin Psychol Rev* 2007;27:959–85.  
34 doi:10.1016/j.cpr.2007.02.005  
35  
36 32 Ruo B, Rumsfeld JS, Hlatky MA, *et al.* Depressive Symptoms and Health-Related Quality of Life: The  
37 Heart and Soul Study. *JAMA* 2003;290:215–21. doi:10.1001/jama.290.2.215  
38  
39 33 Cheung RC, Hanson AK, Maganti K, *et al.* Viral Hepatitis and Other Infectious Diseases in a Homeless  
40 Population. *J Clin Gastroenterol* 2002;34:476-80.  
41  
42 34 Feldmann J, Middleman AB. Homeless adolescents: Common clinical concerns. *Semin Pediatr Infect Dis*  
43 2003;14:6–11. doi:10.1053/spid.2003.127211  
44  
45 35 Spinelli MA, Ponath C, Tieu L, *et al.* Factors associated with substance use in older homeless adults:  
46 Results from the HOPE HOME study. *Subst Abuse* 2017;38:88–94. doi:10.1080/08897077.2016.1264534  
47  
48 36 Upshur CC, Jenkins D, Weinreb L, *et al.* Prevalence and predictors of substance use disorders among  
49 homeless women seeking primary care: An 11 site survey. *Am J Addict* 2017;26:680–88.  
50 doi:10.1111/ajad.12582  
51  
52  
53  
54  
55  
56  
57  
58  
59  
60

1  
2  
3  
4  
5  
6  
7  
8  
9  
10  
11  
12  
13  
14  
15  
16  
17  
18  
19  
20  
21  
22  
23  
24  
25  
26  
27  
28  
29  
30  
31  
32  
33  
34  
35  
36  
37  
38  
39  
40  
41  
42  
43  
44  
45  
46  
47  
48  
49  
50  
51  
52  
53  
54  
55  
56  
57  
58  
59  
60

For peer review only

1  
2  
3  
4  
5  
6  
7  
8  
9  
10  
11  
12  
13  
14  
15  
16  
17  
18  
19  
20  
21  
22  
23  
24  
25  
26  
27  
28  
29  
30  
31  
32  
33  
34  
35  
36  
37  
38  
39  
40  
41  
42  
43  
44  
45  
46  
47  
48  
49  
50  
51  
52  
53  
54  
55  
56  
57  
58  
59  
60STROBE Statement—Checklist of items that should be included in reports of *cross-sectional studies*

|                           | Item No | Recommendation                                                                                                                                                                                               | Page No |
|---------------------------|---------|--------------------------------------------------------------------------------------------------------------------------------------------------------------------------------------------------------------|---------|
| <b>Title and abstract</b> | 1       | (a) Indicate the study's design with a commonly used term in the title or the abstract                                                                                                                       | 1-2     |
|                           |         | (b) Provide in the abstract an informative and balanced summary of what was done and what was found                                                                                                          | 2       |
| <b>Introduction</b>       |         |                                                                                                                                                                                                              |         |
| Background/rationale      | 2       | Explain the scientific background and rationale for the investigation being reported                                                                                                                         | 4       |
| Objectives                | 3       | State specific objectives, including any prespecified hypotheses                                                                                                                                             | 4-5     |
| <b>Methods</b>            |         |                                                                                                                                                                                                              |         |
| Study design              | 4       | Present key elements of study design early in the paper                                                                                                                                                      | 5       |
| Setting                   | 5       | Describe the setting, locations, and relevant dates, including periods of recruitment, exposure, follow-up, and data collection                                                                              | 5       |
| Participants              | 6       | (a) Give the eligibility criteria, and the sources and methods of selection of participants                                                                                                                  | 5       |
| Variables                 | 7       | Clearly define all outcomes, exposures, predictors, potential confounders, and effect modifiers. Give diagnostic criteria, if applicable                                                                     | 5-7     |
| Data sources/measurement  | 8*      | For each variable of interest, give sources of data and details of methods of assessment (measurement). Describe comparability of assessment methods if there is more than one group                         | 5-7     |
| Bias                      | 9       | Describe any efforts to address potential sources of bias                                                                                                                                                    | 5-7     |
| Study size                | 10      | Explain how the study size was arrived at                                                                                                                                                                    | 5       |
| Quantitative variables    | 11      | Explain how quantitative variables were handled in the analyses. If applicable, describe which groupings were chosen and why                                                                                 | 7-8     |
| Statistical methods       | 12      | (a) Describe all statistical methods, including those used to control for confounding                                                                                                                        | 7-8     |
|                           |         | (b) Describe any methods used to examine subgroups and interactions                                                                                                                                          | 7-8     |
|                           |         | (c) Explain how missing data were addressed                                                                                                                                                                  | 7-8     |
|                           |         | (d) If applicable, describe analytical methods taking account of sampling strategy                                                                                                                           | 7-8     |
|                           |         | (e) Describe any sensitivity analyses                                                                                                                                                                        | 7-8     |
| <b>Results</b>            |         |                                                                                                                                                                                                              |         |
| Participants              | 13*     | (a) Report numbers of individuals at each stage of study—eg numbers potentially eligible, examined for eligibility, confirmed eligible, included in the study, completing follow-up, and analysed            | 8-10    |
|                           |         | (b) Give reasons for non-participation at each stage                                                                                                                                                         | 8-10    |
|                           |         | (c) Consider use of a flow diagram                                                                                                                                                                           |         |
| Descriptive data          | 14*     | (a) Give characteristics of study participants (eg demographic, clinical, social) and information on exposures and potential confounders                                                                     | 8-10    |
|                           |         | (b) Indicate number of participants with missing data for each variable of interest                                                                                                                          | 8-10    |
| Outcome data              | 15*     | Report numbers of outcome events or summary measures                                                                                                                                                         | 8-10    |
| Main results              | 16      | (a) Give unadjusted estimates and, if applicable, confounder-adjusted estimates and their precision (eg, 95% confidence interval). Make clear which confounders were adjusted for and why they were included | 8-10    |

|                          |    |                                                                                                                                                                            |       |
|--------------------------|----|----------------------------------------------------------------------------------------------------------------------------------------------------------------------------|-------|
|                          |    | (b) Report category boundaries when continuous variables were categorized                                                                                                  | 8-10  |
|                          |    | (c) If relevant, consider translating estimates of relative risk into absolute risk for a meaningful time period                                                           | 8-10  |
| Other analyses           | 17 | Report other analyses done—eg analyses of subgroups and interactions, and sensitivity analyses                                                                             | 8-10  |
| <b>Discussion</b>        |    |                                                                                                                                                                            |       |
| Key results              | 18 | Summarise key results with reference to study objectives                                                                                                                   | 11    |
| Limitations              | 19 | Discuss limitations of the study, taking into account sources of potential bias or imprecision. Discuss both direction and magnitude of any potential bias                 | 12    |
| Interpretation           | 20 | Give a cautious overall interpretation of results considering objectives, limitations, multiplicity of analyses, results from similar studies, and other relevant evidence | 11-12 |
| Generalisability         | 21 | Discuss the generalisability (external validity) of the study results                                                                                                      | 11-12 |
| <b>Other information</b> |    |                                                                                                                                                                            |       |
| Funding                  | 22 | Give the source of funding and the role of the funders for the present study and, if applicable, for the original study on which the present article is based              | 13    |

\*Give information separately for exposed and unexposed groups.

**Note:** An Explanation and Elaboration article discusses each checklist item and gives methodological background and published examples of transparent reporting. The STROBE checklist is best used in conjunction with this article (freely available on the Web sites of PLoS Medicine at <http://www.plosmedicine.org/>, Annals of Internal Medicine at <http://www.annals.org/>, and Epidemiology at <http://www.epidem.com/>). Information on the STROBE Initiative is available at [www.strobe-statement.org](http://www.strobe-statement.org).

# BMJ Open

## Health behaviours and mental and physical health status in older adults with a history of homelessness: a population-based study

|                                 |                                                                                                                                                                                                                                                                                                                                                                                                                                                                                                                                                                                                                                                                                                                                                                                                                                                               |
|---------------------------------|---------------------------------------------------------------------------------------------------------------------------------------------------------------------------------------------------------------------------------------------------------------------------------------------------------------------------------------------------------------------------------------------------------------------------------------------------------------------------------------------------------------------------------------------------------------------------------------------------------------------------------------------------------------------------------------------------------------------------------------------------------------------------------------------------------------------------------------------------------------|
| Journal:                        | <i>BMJ Open</i>                                                                                                                                                                                                                                                                                                                                                                                                                                                                                                                                                                                                                                                                                                                                                                                                                                               |
| Manuscript ID                   | bmjopen-2018-028003.R1                                                                                                                                                                                                                                                                                                                                                                                                                                                                                                                                                                                                                                                                                                                                                                                                                                        |
| Article Type:                   | Research                                                                                                                                                                                                                                                                                                                                                                                                                                                                                                                                                                                                                                                                                                                                                                                                                                                      |
| Date Submitted by the Author:   | 12-Mar-2019                                                                                                                                                                                                                                                                                                                                                                                                                                                                                                                                                                                                                                                                                                                                                                                                                                                   |
| Complete List of Authors:       | Smith, Lee; Anglia Ruskin University, Department of Life Sciences<br>Veronese, Nicola; National Research Council, Neuroscience Institute, Aging Branch<br>López-Sánchez, Guillermo Felipe; Faculty of Sport Sciences, University of Murcia<br>Moller, Eloise ; The Single Homeless Project<br>Johnstone, James ; The Cambridge Centre for Sport and Exercise Sciences, Anglia Ruskin University<br>Firth, Joseph ; NICM Health Research Institute, Western Sydney University<br>Grabovac, Igor; Centre for Public Health, Medical University of Vienna, Department of Social and Preventive Medicine<br>Yang, Lin; Medical University of Vienna, Epidemiology<br>Soysal, Pinar; Faculty of Medicine, Bezmialem Vakif University, Department of Geriatric Medicine<br>Jackson, Sarah ; University College London, Department of Behavioural Science and Health |
| <b>Primary Subject Heading</b>: | Epidemiology                                                                                                                                                                                                                                                                                                                                                                                                                                                                                                                                                                                                                                                                                                                                                                                                                                                  |
| Secondary Subject Heading:      | Epidemiology                                                                                                                                                                                                                                                                                                                                                                                                                                                                                                                                                                                                                                                                                                                                                                                                                                                  |
| Keywords:                       | Homelessness, physical health, MENTAL HEALTH, health behaviour, older adults                                                                                                                                                                                                                                                                                                                                                                                                                                                                                                                                                                                                                                                                                                                                                                                  |
|                                 |                                                                                                                                                                                                                                                                                                                                                                                                                                                                                                                                                                                                                                                                                                                                                                                                                                                               |

SCHOLARONE™  
Manuscripts

# Health behaviours and mental and physical health status in older adults with a history of homelessness: a population-based study

Smith L,<sup>1\*</sup> Veronese N,<sup>2</sup> López-Sánchez GF,<sup>3</sup> Moller E,<sup>4</sup> Johnstone J,<sup>5</sup> Firth J,<sup>6</sup> Grabovac I,<sup>7</sup> Yang L,<sup>8</sup> Soysal P,<sup>9</sup> Jackson SE<sup>10\*</sup>

1. The Cambridge Centre for Sport and Exercise Sciences, Anglia Ruskin University, Cambridge. [Lee.Smith@anglia.ac.uk](mailto:Lee.Smith@anglia.ac.uk)
2. National Research Council, Neuroscience Institute, Aging Branch, Padova, Italy. [ilmannato@gmail.com](mailto:ilmannato@gmail.com)
3. Faculty of Sport Sciences, University of Murcia, Spain. [gfls@um.es](mailto:gfls@um.es)
4. The Single Homeless Project, UK, London. [Emoller@shp.org.uk](mailto:Emoller@shp.org.uk)
5. The Cambridge Centre for Sport and Exercise Sciences, Anglia Ruskin University, Cambridge. [james.johnstone@anglia.ac.uk](mailto:james.johnstone@anglia.ac.uk)
6. NICM Health Research Institute, Western Sydney University, Westmead, Australia. [j.firth@westernsydney.edu.au](mailto:j.firth@westernsydney.edu.au)
7. Department of Social and Preventive Medicine, Centre for Public Health, Medical University of Vienna, Vienna, Austria. [igor.grabovac@meduniwien.ac.at](mailto:igor.grabovac@meduniwien.ac.at)
8. Department of Epidemiology, Center for Public Health, Medical University of Vienna, Vienna, Austria. [Lin.yang@muv.ac.at](mailto:Lin.yang@muv.ac.at)
9. Department of Geriatric Medicine, Faculty of Medicine, Bezmialem Vakif University, Istanbul, Turkey. [dr.pinarsoysal@hotmail.com](mailto:dr.pinarsoysal@hotmail.com)
10. Department of Behavioural Science and Health, University College London, London, UK. [s.e.jackson@ucl.ac.uk](mailto:s.e.jackson@ucl.ac.uk)

**\*Corresponding authors:** Dr Sarah E Jackson, PhD. Department of Behavioural Science and Health, University College London, 1-19 Torrington Place, London WC1E 6BT [s.e.jackson@ucl.ac.uk](mailto:s.e.jackson@ucl.ac.uk); and Dr Lee Smith, PhD. Cambridge Centre for Sports and Exercise Sciences, Anglia Ruskin University, Cambridge [lee.smith@anglia.ac.uk](mailto:lee.smith@anglia.ac.uk)

**Word count (excluding title page, abstract, references, figures and tables):** 2726.

# Health behaviours and mental and physical health status in older adults with a history of homelessness: a population-based study

## ABSTRACT

**Objectives:** This study compared (i) levels of engagement in lifestyle risk behaviours and (ii) mental and physical health status in individuals who have previously been homeless to those of individuals who have not.

**Design:** Cross-sectional. **Participants:** Data were from participants (n=6,931) of the English Longitudinal Study of Ageing. **Measures:** Participants reported whether they had ever been homeless. We used regression models to analyse associations between homelessness and (i) cigarette smoking, daily alcohol consumption and physical inactivity, adjusting for sociodemographic covariates (age, sex, ethnicity, highest level of education, marital status, and household non-pension wealth), and (ii) self-rated health, limiting long-standing illness, depressive symptoms, life satisfaction, quality of life and loneliness, adjusting for sociodemographics and health behaviours. **Results:** 104 participants (1.5%) reported having been homeless. Individuals who had been homeless were significantly more likely to be physically inactive (OR=1.62, 95% CI 1.44 to 2.52), report fair/bad/very bad self-rated health (OR=1.75, 95% CI 1.07 to 2.86), have a limiting long-standing illness (OR=2.66, 95% CI 1.65 to 4.30) and be depressed (OR=3.06, 95% CI 1.85 to 5.05), and scored lower on measures of life satisfaction (17.34 vs. 19.96,  $p<0.001$ ) and quality of life (39.02 vs. 41.21,  $p=0.013$ ). Rates of smoking (20.2% vs. 15.4%,  $p=0.436$ ), daily drinking (27.6% vs. 22.8%,  $p=0.385$ ), and loneliness (27.1% vs. 21.0%,  $p=0.080$ ) were also elevated. **Conclusions:** Those who were once homeless have poorer mental and physical health outcomes and are more likely to be physically inactive. Interventions to improve their health and quality of life are required.

**Keywords:** Homelessness, physical health, mental health, health behaviour, older adults.

### Strengths and limitations of this study

- To our knowledge, this is the first study to examine health outcomes in those who have transitioned out of homelessness.
- The very small number of participants with a history of homelessness in our sample meant that analyses were underpowered to detect modest differences between groups.
- However, the fact that we observed significant differences in the majority of the outcomes we analysed attests to the strength of these associations.
- Information on time since the period(s) of homelessness was not available so we were unable to evaluate the extent to which recency of homelessness is related to our outcomes of interest.
- Information on what way the participants were homeless (rough sleepers, statutory homeless families) was not available.



## INTRODUCTION

Homelessness is a substantial and growing problem in the United Kingdom. The annual homelessness monitor from Crisis and the Joseph Rowntree Foundation showed that in 2015/16 there were 271,000 local authority homelessness case actions in the UK, a rise of 32% since 2009/10.[1] Being homeless, or at risk of homelessness, has been shown to have a detrimental impact upon mental and physical health.[2] A recent systematic review concluded that people who are homeless are at increased risk of respiratory conditions, depression, anxiety, and excess winter mortality, compared with the general population.[3] Homelessness is associated with premature death, with the single homeless at the highest risk with an average age of death at 47 years, some 30 years lower than in the general population.[4]

Increased morbidity and mortality among the homeless may be driven, at least in part, by higher levels of engagement in lifestyle risk behaviours. Data from the USA indicate that while 19.8% of adult Americans smoke, smoking prevalence is over 70% among those who are homeless.[5–8] Levels of physical activity are also low among the homeless. In a Danish study, approximately 70% of homeless individuals reported no participation in any form of exercise.[9] High levels of alcohol consumption and drug use are also common among this population.[10]

Tackling homelessness is an urgent priority, and targeted policies have been actioned in the UK to rehouse those who are homeless. The Homelessness Directorate was established in 2002 in order to assist local authorities in tackling homelessness.[11] Strategies focus on preventing the need for people to sleep rough in the first place, as well as supporting people to move on from homelessness by helping them to address their needs, improving access to health and substance misuse services, and helping them rebuild their lives through education, training and employment.[12] A number of UK charities (e.g. Crisis, Shelter England, The Single Homeless Project) also work to support people who are homeless in acquiring a home and entering back into employment. With such policies and charities in operation, a significant number of individuals are able to transition out of homelessness.

1  
2  
3 While the evidence base on the health risks associated with homelessness is growing, to our knowledge no  
4 studies have explored what happens to the health and wellbeing of people when they are no longer  
5 homeless. Given that lifestyle behaviours tend to track over the life course,[13] and early life exposures can  
6 have a substantial impact on later-life health outcomes,[14] it seems likely that the health risks associated  
7 with homelessness may persist, at least to some extent, beyond the period of homelessness. The present  
8 study aimed to investigate this through a comparison of (i) levels of engagement in lifestyle risk behaviours  
9 and (ii) mental and physical health status in individuals who have previously spent a period of time in their  
10 lives as homeless with those of individuals who have never been homeless, in a population-based sample of  
11 older adults living in England. Specifically, we aimed to address the following research questions:

- 12 1. To what extent do individuals with a history of homelessness differ from those who have never  
13 been homeless with regard to smoking status, alcohol intake, and level of physical activity, adjusting  
14 for relevant sociodemographic characteristics?
- 15 2. To what extent do individuals with a history of homelessness differ from those who have never  
16 been homeless with regard to self-rated health, limiting long-standing illness, depressive symptoms,  
17 life satisfaction, quality of life, and loneliness, adjusting for relevant sociodemographic  
18 characteristics and health behaviours?

19  
20  
21 We hypothesised that individuals who had previously been homeless would have a higher prevalence of  
22 lifestyle risk behaviours and an unfavourable mental and physical health profile compared with those who  
23 had never been homeless.  
24  
25  
26  
27  
28  
29  
30  
31

## 32 33 34 35 36 37 38 39 40 41 **METHODS**

### 42 43 44 **Study population**

45  
46 Data were from the English Longitudinal Study of Ageing (ELSA), a nationally-representative longitudinal  
47 panel study of men and women aged 50 and older living in households across England.[15] The study began  
48 in 2002, with subsequent rounds of data collection at two-year intervals via computer-assisted personal  
49 interview and self-completion questionnaires. Wave 3 (2006/07) included a life history questionnaire, which  
50 gathered detailed information about important events that occurred in the participants' lives, including  
51 whether they had ever been homeless. Of the 9,771 participants interviewed in Wave 3 of ELSA, 7,855

(80.4%) completed the life history questionnaire. We excluded 924 participants (11.8%) with missing data on homelessness or sociodemographic covariates, leaving a final sample for analysis of 6,931 men and women. Ethical approval was obtained from the National Research Ethics Service and all participants gave full informed consent.

### **Patient and Public Involvement**

Patients were not involved in the design of this study.

### **Measures**

#### History of homelessness

Participants were asked whether they had ever been homeless for one month or more (yes/no).

#### Health behaviours

Smoking status was assessed with the question “*Do you smoke cigarettes at all nowadays*” (yes/no).

Frequency of alcohol intake over the past 12 months was reported on an 8-point scale from “not at all in the last 12 months” to “almost every day”. We dichotomised responses to distinguish between participants drinking almost every day (“daily drinking”) vs. less than this.

Physical activity was assessed with three items that asked respondents about the frequency with which they took part in vigorous, moderate and low-intensity activities (more than once a week, once a week, 1-3 times a month, hardly ever/never)[16]. Responses were dichotomised as follows: inactive (no moderate/vigorous activity on a weekly basis) vs. active (moderate or vigorous activity at least once a week).

#### Health and wellbeing

Self-rated health was assessed using a single item: “*Would you say your health is... very good/good/fair/bad/very bad?*” We analysed the proportion of individuals rating their health as fair, bad or very bad, as is commonly done in analyses of this variable.[17,18]

Limiting long-standing illness was assessed with two questions: (1) “*Do you have any long-standing illness, disability, or infirmity? By long-standing I mean anything that has troubled you over a period of time or that*

1  
2  
3 *is likely to affect you over a period of time.*" If they responded yes, they were asked (2) *"Does this illness or*  
4 *disability limit your activities in any way?"* Affirmation of a long-standing illness and any form of limitation  
5 classified the participant as having a limiting long-standing illness.  
6  
7

8  
9 Depressive symptoms were assessed with an eight-item version of the Center for Epidemiologic Studies  
10 Depression Scale (CES-D) [19], a scale highly validated for use in older adults [20]. This asks about feelings  
11 over the last week (e.g. "Over the last week have you felt sad"), with binary response options (1=yes, 0=no).  
12 Positively framed items were reverse scored. Data were dichotomised using an established cut-off, with a  
13 score of 4 or higher indicating significant symptomatology.[20]  
14  
15

16  
17  
18 Life satisfaction was assessed with the Satisfaction With Life Scale,[21] which asks respondents to rate the  
19 extent to which they agree with five statements: *"In most ways my life is close to my ideal"*; *"The conditions*  
20 *of my life are excellent"*; *"I am satisfied with my life"*; *"So far I have got the important things I want in life"*;  
21 *"If I could live my life again, I would change almost nothing"* on a scale from 0 (strongly disagree) to 6  
22 (strongly agree). Responses are summed to produce a total score between 0 and 30, with higher scores  
23 indicating greater life satisfaction.  
24  
25  
26  
27  
28

29  
30 Quality of life was assessed with the CASP-19,[22] a scale designed to measure quality of life in older  
31 people. Items cover four domains of quality of life; control (e.g. *"I feel that what happens to me is out of my*  
32 *control"*), autonomy (e.g. *"My health stops me from doing things I want to do"*), self-realisation (e.g. *"I feel*  
33 *that life is full of opportunities"*), and pleasure (e.g. *"I enjoy being in the company of others"*). Respondents  
34 are asked how often each statement applies to them (often=0, sometimes=1, not often=2, never=3).  
35 Positively-worded items are reverse scored so that a higher total score indicates higher quality of life (range:  
36 0–57).  
37  
38  
39  
40  
41

42 Loneliness was measured using a three-item short form of the Revised University of California Los Angeles  
43 (UCLA) Loneliness Scale.[23] Participants were asked: *"How often do you feel you lack*  
44 *companionship?"*(hardly ever or never=1, some of the time=2, often=3). Scores ranged from 3 to 9, with  
45 higher scores indicating greater loneliness. They were dichotomised at  $\geq 6$  versus  $< 6$  to indicate high versus  
46 low loneliness.[24]  
47  
48  
49  
50

51 Sociodemographic covariates  
52  
53  
54  
55  
56  
57  
58  
59  
60

1  
2  
3 Interviewers collected information on age, sex, ethnicity, the highest level of education, marital status and  
4 wealth. For these analyses, ethnicity was categorised as white or non-white. We classified education as low  
5 (no formal qualifications), intermediate (up to degree) or high (degree or higher). Marital status was  
6 categorised as married or unmarried (never married, divorced or widowed). Wealth was categorised into  
7 five equal groups of net total non-pension wealth measured at the benefit unit level (a benefit unit is a  
8 couple or single person along with any dependent children they might have) across all ELSA participants  
9 who took part in Wave 3. Wealth has been identified as a particularly appropriate indicator of SES in this  
10 age group.[25]  
11  
12  
13  
14  
15  
16  
17  
18  
19  
20

## 21 **Statistical analysis**

22  
23 All analyses were conducted using SPSS version 24. Data were weighted to correct for sampling probabilities  
24 and for differential non-response and to calibrate back to the 2011 National Census population distributions  
25 for age and sex. The weights accounted for the differential probability of being included in Wave 3 of ELSA  
26 and for non-response to the life history interview.  
27  
28  
29  
30

31 Differences in sociodemographic characteristics of the groups who did and did not report a history of  
32 homelessness were tested using independent t-tests for continuous variables and Pearson's chi-square tests  
33 for categorical variables. We used binary logistic regression to analyse associations between history of  
34 homelessness and cigarette smoking, daily drinking and physical inactivity, adjusting for sociodemographic  
35 covariates. We then used linear regression (for continuous outcomes) and binary logistic regression (for  
36 categorical outcomes) to analyse associations between history of homelessness and health and wellbeing,  
37 adjusting for sociodemographics and health behaviours. In all models, the reference category was the group  
38 without a history of homelessness. A  $p$ -value  $<0.05$  was used to indicate statistical significance.  
39  
40  
41  
42  
43  
44  
45

## 46 **RESULTS**

### 47 **Sample characteristics**

48  
49 Of the 6,931 participants in our sample, 104 (1.5%) reported having been homeless for one month or more  
50 and 6,827 (98.5%) had never been homeless for one month or more. Sample characteristics in relation to  
51 history of homelessness are summarised in Table 1. On average, participants who had been homeless were  
52  
53  
54  
55  
56  
57  
58  
59  
60

significantly younger than those who had not been homeless (60.9 vs. 65.7 years) and a greater proportion were non-white (6.6% vs. 3.1%), unmarried (54.3% vs. 33.8%) and from the lowest quintile of wealth (44.3% vs. 18.9%). A marginally higher proportion of the group who had been homeless were male (53.8% vs. 46.7%) although the difference was not statistically significant ( $p=0.149$ ). There was no significant difference between groups in the highest level of education achieved.

**Table 1** Sample characteristics in relation to history of homelessness

|                            | Had not been<br>homeless<br>( $n=6,827$ ) <sup>1</sup> | Had been<br>homeless<br>( $n=104$ ) | <i>p</i> |
|----------------------------|--------------------------------------------------------|-------------------------------------|----------|
| Age (years), mean (SD)     | 65.74 (10.64)                                          | 60.94 (8.32)                        | <0.001   |
| Sex                        |                                                        |                                     |          |
| Men                        | 46.7                                                   | 53.8                                | 0.149    |
| Women                      | 53.3                                                   | 46.2                                | -        |
| Ethnicity                  |                                                        |                                     |          |
| White                      | 96.9                                                   | 93.4                                | 0.042    |
| Non-white                  | 3.1                                                    | 6.6                                 | -        |
| Highest level of education |                                                        |                                     |          |
| No qualifications          | 32.4                                                   | 27.4                                | 0.541    |
| Below degree               | 52.2                                                   | 56.6                                | -        |
| Degree or higher           | 15.5                                                   | 16.0                                | -        |
| Marital status             |                                                        |                                     |          |
| Married                    | 66.2                                                   | 45.7                                | <0.001   |
| Unmarried                  | 33.8                                                   | 54.3                                | -        |
| Wealth quintile            |                                                        |                                     |          |
| 1 (poorest)                | 18.9                                                   | 44.3                                | <0.001   |
| 2                          | 19.5                                                   | 13.2                                | -        |
| 3                          | 20.6                                                   | 14.2                                | -        |
| 4                          | 20.0                                                   | 16.0                                | -        |
| 5 (richest)                | 21.0                                                   | 12.3                                | -        |

<sup>1</sup> Unweighted sample sizes.

All figures are weighted for sampling probabilities and differential non-response.

Values are percentages unless otherwise stated.

SD = standard deviation.

## History of homelessness and health behaviours

Associations between history of homelessness and health behaviours are shown in Table 2. After adjustment for age, sex, ethnicity, education, marital status and wealth, participants who had been homeless had 1.62 times higher odds (95% CI 1.44 to 2.52) of being inactive than those who had not been homeless (30.7% vs. 23.0%,  $p=0.031$ ). Rates of smoking (20.2% vs. 15.4%) and daily drinking (27.6% vs. 22.8%) were also higher in the group who had been homeless, but differences were not statistically significant.

**Table 2** Associations between history of homelessness and health behaviours

|                     | Had not been homeless | Had been homeless | <i>p</i> |
|---------------------|-----------------------|-------------------|----------|
| Smoking             |                       |                   |          |
| % (SE)              | 15.4 (0.4)            | 20.2 (3.3)        | -        |
| OR [95% CI]         | 1.00 (Ref)            | 1.21 [0.75; 1.94] | 0.436    |
| Daily drinking      |                       |                   |          |
| % (SE)              | 22.8 (0.5)            | 27.6 (4.2)        | -        |
| OR [95% CI]         | 1.00 (Ref)            | 1.31 [0.77; 2.21] | 0.321    |
| Physical inactivity |                       |                   |          |
| % (SE)              | 23.0 (0.5)            | 30.7 (3.7)        | -        |
| OR [95% CI]         | 1.00 (Ref)            | 1.62 [1.04; 2.52] | 0.031    |

All figures are weighted for sampling probabilities and differential non-response, and are adjusted for age, sex, ethnicity, education, marital status and wealth.

SE = standard error, OR = odds ratio, CI = confidence interval.

## History of homelessness and health and wellbeing

Associations between history of homelessness and health and wellbeing are summarised in Table 3. After adjustment for sociodemographics and health behaviours, compared with the group who had not been homeless, the group who had been homeless had 1.75 times higher odds (95% CI 1.07 to 2.86) of reporting

fair/bad/very bad self-rated health (41.9% vs. 30.5%,  $p=0.025$ ), 2.66 times higher odds (95% CI 1.65 to 4.30) of reporting a limiting long-standing illness (55.8% vs. 33.5%,  $p<0.001$ ) and 3.06 times higher odds (95% CI 1.85 to 5.05) of depressive symptoms (33.3% vs. 13.0%,  $p<0.001$ ). The group who had been homeless also scored lower on average on measures of life satisfaction (17.34 vs. 19.96,  $p<0.001$ ) and quality of life (39.02 vs. 41.21,  $p=0.013$ ). The rate of loneliness (27.1% vs. 21.0%) was higher in the group who had been homeless but this difference did not reach statistical significance ( $p=0.110$ ).

**Table 3** Associations between history of homelessness and health and wellbeing

|                                     | Had not been homeless | Had been homeless    | <i>p</i> |
|-------------------------------------|-----------------------|----------------------|----------|
| Fair/bad/very bad self-rated health |                       |                      |          |
| % (SE)                              | 30.5 (0.6)            | 41.9 (4.5)           | -        |
| OR [95% CI]                         | 1.00 (Ref)            | 1.75 [1.07; 2.86]    | 0.025    |
| Limiting long-standing illness      |                       |                      |          |
| % (SE)                              | 33.5 (0.6)            | 55.8 (4.7)           | -        |
| OR [95% CI]                         | 1.00 (Ref)            | 2.66 [1.65; 4.30]    | <0.001   |
| Depressive symptoms above threshold |                       |                      |          |
| % (SE)                              | 13.0 (0.4)            | 33.3 (3.5)           | -        |
| OR [95% CI]                         | 1.00 (Ref)            | 3.06 [1.85; 5.05]    | <0.001   |
| Life satisfaction                   |                       |                      |          |
| Mean score (SE)                     | 19.96 (0.1)           | 17.34 (0.7)          | -        |
| Coeff. [95% CI]                     | Ref                   | -2.78 [-4.18; -1.37] | <0.001   |
| Quality of life                     |                       |                      |          |
| Mean score (SE)                     | 41.21 (0.1)           | 39.02 (0.9)          | -        |
| Coeff. [95% CI]                     | Ref                   | -2.25 [-4.03; -0.47] | 0.013    |
| High loneliness                     |                       |                      |          |
| % (SE)                              | 21.0 (0.5)            | 27.1 (4.2)           | -        |
| OR [95% CI]                         | 1.00 (Ref)            | 1.50 [0.91; 2.47]    | 0.110    |

All figures are weighted for sampling probabilities and differential non-response and adjusted for age, sex, ethnicity, education, marital status, wealth, smoking status, alcohol intake and physical activity.

SE = standard error, OR = odds ratio, CI = confidence interval, Coeff = coefficient.

Possible scores on the quality of life scale range from 0-57, and on life satisfaction scale range from 0-30.

## DISCUSSION

In the present analyses, a total of 104 participants reported having been homeless for one month or more. Those who reported a history of homelessness had significantly higher odds of physical inactivity than those



1  
2  
3 who had not been homeless and were more likely to smoke and drink daily but these did not reach  
4 significance. Importantly, those who had reported being homeless had a higher odds of reporting  
5 fair/bad/very bad self-rated health, limiting long-standing illness and depressive symptoms and scored  
6 lower on measures of life satisfaction and quality of life. Taken together, these data suggest that people  
7 who transition out of homelessness may be at increased risk of partaking in unhealthy behaviour and suffer  
8 poorer mental and physical health.  
9

10  
11  
12  
13  
14 The finding that those who were previously homeless were more likely to be inactive than those who were  
15 not is of importance. Indeed, sustained and regular participation in physical activity can aid in the  
16 prevention against, and improve the profile of, non-communicable diseases – including those in relation to  
17 both physical (e.g. cardio respiratory; [26]) and mental (e.g. anxiety and depression; [27,28]) health, both of  
18 which are common in homeless populations [3]. Moreover, similar health profiles were observed in the  
19 present manuscript in a population who has transitioned from homelessness. Literature suggests that levels  
20 of physical activity track across the life course [29]. Importantly, those who are homeless have critically low  
21 levels of physical activity. For example, in a Danish study, approximately 70% of the homeless reported no  
22 participation in any form of exercise [9]. This low level of physical activity is potentially tracking through the  
23 transition from homelessness.  
24  
25  
26  
27  
28  
29  
30

31  
32 The novel finding that people who have ever been homeless are at increased risk of adverse physical and  
33 mental health outcomes is important. This suggests that the transition from homelessness is not enough to  
34 bring the health profile of this population in alignment with the general public. There are several factors  
35 that may account for the observed disparity in health. First, depression is prevalent among the homeless  
36 community [30] and is a highly recurrent disorder, [31] thus is likely to reoccur after the transition out of  
37 homelessness, with significant personal consequences.[31] Low mood may be partly driving the observed  
38 negative associations with life satisfaction, quality of life, and limiting-long standing illness. [32]  
39  
40  
41  
42  
43  
44

45 Second, people who are homeless are susceptible to multiple health complications. Chronic hepatitis C and  
46 co-infections are common among the homeless population.[33] Other conditions that are prevalent among  
47 the homeless include tuberculosis, uncontrolled asthma, and dermatologic infestations.[34] These problems  
48 are compounded by high rates of drug and alcohol abuse and together likely contribute to poorer self-rated  
49 health, limiting-long standing illness and lower quality of life across the lifespan.[35,36]  
50  
51  
52  
53

54 To our knowledge, this is the first study to examine health outcomes in those who have transitioned out of  
55 homelessness. While these findings are important for advancing the evidence base in this area, they should  
56  
57  
58

1  
2  
3 be considered in light of a couple of limitations. The very small number of participants with a history of  
4 homelessness in our sample meant that analyses were underpowered to detect modest differences  
5 between groups. However, the fact that we observed significant differences in the majority of the outcomes  
6 we analysed attests to the strength of these associations. Nevertheless, future research using larger  
7 samples is required to confirm or refute our findings. While we adjusted for a wide range of  
8 sociodemographic and behavioural covariates, it is possible that the results could be explained by residual  
9 confounding by unmeasured variables – i.e. the group reporting a history of homelessness were deprived in  
10 ways that were not reflected in the existing variables. Information on time since the period(s) of  
11 homelessness was not available so we were unable to evaluate the extent to which recency of  
12 homelessness is related to our outcomes of interest. It is possible that participants who reported a history  
13 of homelessness had transitioned out of homelessness many years or even decades prior. In addition,  
14 information on type of homelessness was not available. It is therefore unknown whether those who  
15 reported once being homeless were “rough sleepers” or “statutory homeless”. Type of homelessness may  
16 have varying influences on health/ behaviour and future research to tease out the influence of type of  
17 previous homelessness on these outcomes is required. Finally, ELSA does not collect data on those currently  
18 homeless and thus it was not possible to have a “currently homeless” category in the present analyses.  
19 Given that we did not observe significant differences in some outcomes previously demonstrated to differ  
20 between currently homeless and housed populations (e.g. smoking), it might be the case that those who  
21 manage to transition out of homelessness are able to offset some of the increased risk associated with  
22 having been homeless. Future research may wish to compare those never homeless, those currently  
23 homeless, and those previously homeless to gain a deeper insight.  
24  
25  
26  
27  
28  
29  
30  
31  
32  
33  
34  
35  
36  
37  
38

## 39 CONCLUSION

40  
41  
42 In conclusion, the present results indicate that older adults in England who have previously been homeless  
43 are more likely to be physically inactive and have poorer mental and physical health outcomes than those  
44 who have never been homeless.  
45  
46

47  
48 Continued initiatives to tackle homelessness itself is important. It is also crucial to consider that even those  
49 who have transitioned from homelessness continue to be at much higher risk of poor health and wellbeing.  
50 Therefore, continued monitoring and targeted interventions are required to improve health outcomes and  
51 quality of life in this population. Such interventions may wish to consider lifestyle risk behaviours to improve  
52 mental and physical health status.  
53  
54  
55  
56  
57  
58  
59  
60

**Authors Contributions:** Study concept and design: LS and SEJ. Analysis and interpretation of data: LS and SEJ. Drafting of the manuscript: LS, NV, GFLS, EM, JJ, JF, IG, LY, PS, SEJ. Critical revision of the manuscript for important intellectual content: LS, NV, GFLS, EM, JJ, JF, IG, LY, PS, SEJ.

**Conflicts of Interest:** None declared.

**Funding:** This research did not receive any funding from agencies in the public, commercial, or not-for-profit sectors.

**Ethics:** Ethical approval was obtained from the National Research Ethics Service and all participants gave full informed consent.

**Data sharing:** No additional data available.

## REFERENCES

- 1 Fitzpatrick S, Pawson H, Bramley G, *et al*. The homelessness monitor: England 2017. Institute for Social Policy, Environment and Real Estate (I-SPHERE), Heriot-Watt University; City Futures Research Centre, University of New South Wales 2017.
- 2 Adebowale V. There is no excuse for homelessness in Britain in 2018. *BMJ* 2018;**360**:k902. doi:10.1136/bmj.k902
- 3 Thomson H, Thomas S, Sellstrom E, *et al*. Housing improvements for health and associated socio-economic outcomes. *Cochrane Database Syst Rev* 2013;:CD008657. doi:10.1002/14651858.CD008657.pub2
- 4 Homelessness: A Silent Killer (2011). Crisis. <https://www.crisis.org.uk/ending-homelessness/homelessness-knowledge-hub/health-and-wellbeing/homelessness-a-silent-killer-2011/> (accessed 11 Oct 2018).
- 5 Kermode M, Crofts N, Miller P, *et al*. Health indicators and risks among people experiencing homelessness in Melbourne, 1995-1996. *Aust N Z J Public Health* 1998;**22**:464-70.
- 6 Fischer PJ, Breakey WR. The epidemiology of alcohol, drug, and mental disorders among homeless persons. *Am Psychol* 1991;**46**:1115-28.
- 7 Connor SE, Cook RL, Herbert MI, *et al*. Smoking cessation in a homeless population: there is a will, but is there a way? *J Gen Intern Med* 2002;**17**:369-72.
- 8 Centers for Disease Control and Prevention (CDC). Cigarette smoking among adults--United States, 2007. *MMWR Morb Mortal Wkly Rep* 2008;**57**:1221-6.

- 1
- 2
- 3 9 Pedersen P, Christensen AI, Hess U, *et al.* Susydsat-sundhedsproil for social udsatte I Danmark 2007.  
4 Copenhagen: : Radet for socialt udsatte 2008.  
5
- 6
- 7 10 O'Toole TP, Gibbon JL, Hanusa BH, *et al.* Self-Reported Changes in Drug and Alcohol Use After Becoming  
8 Homeless. *Am J Public Health* 2004;**94**:830–5. doi:10.2105/AJPH.94.5.830  
9
- 10 11 Office of the Deputy Prime Minister. Select Committee on Office of the Deputy Prime Minister: Housing,  
11 Planning, Local Government and the Regions Written Evidence: Memorandum by the Office of the  
12 Deputy Prime Minister (HOM 53).  
13 2004.<https://publications.parliament.uk/pa/cm200304/cmselect/cmmodpm/1116/1116we56.htm>  
14 (accessed 11 Oct 2018).  
15
- 16 12 Jones A, Pleace N. Review of single homelessness in the uk 2000-2010. Br. Libr.  
17 2010.<http://www.bl.uk/collection-items/review-of-single-homelessness-in-the-uk-20002010> (accessed  
18 11 Oct 2018).  
19
- 20 13 Malina RM. Tracking of physical activity and physical fitness across the lifespan. *Res Q Exerc Sport*  
21 1996;**67**:S48-57.  
22
- 23 14 Ben-Shlomo Y, Mishra G, Kuh D. Life Course Epidemiology. In: Ahrens W, Pigeot I, eds. *Handbook of*  
24 *Epidemiology*. New York, NY: : Springer New York 2014. 1521–49. doi:10.1007/978-0-387-09834-0\_56  
25
- 26 15 Steptoe A, Breeze E, Banks J, *et al.* Cohort profile: the English Longitudinal Study of Ageing. *Int J*  
27 *Epidemiol* 2013;**42**:1640–8. doi:10.1093/ije/dys168  
28
- 29 16 Demakakos P, Hamer M, Stamatakis E, *et al.* Low-intensity physical activity is associated with reduced  
30 risk of incident type 2 diabetes in older adults: evidence from the English Longitudinal Study of Ageing.  
31 *Diabetologia* 2010;**53**:1877–85. doi:10.1007/s00125-010-1785-x  
32
- 33 17 Steptoe A, Jackson SE. The Life Skills of Older Americans: Association with Economic, Psychological,  
34 Social, and Health Outcomes. *Sci Rep* 2018;**8**:9669. doi:10.1038/s41598-018-27909-w  
35
- 36 18 DeSalvo KB, Bloser N, Reynolds K, *et al.* Mortality prediction with a single general self-rated health  
37 question. A meta-analysis. *J Gen Intern Med* 2006;**21**:267–75. doi:10.1111/j.1525-1497.2005.00291.x  
38
- 39 19 Radloff LS. The CES-D scale. *Appl Psychol Meas* 1977;**1**:385–401.  
40
- 41 20 Steffick DE. Documentation of affective functioning measures in the Health and Retirement Study.  
42 2000.  
43
- 44 21 Diener E, Emmons RA, Larsen RJ, *et al.* The satisfaction with life scale. *J Assess* 1985;**49**:71–75.  
45
- 46 22 Hyde M, Wiggins RD, Higgs P, *et al.* A measure of quality of life in early old age: the theory,  
47 development and properties of a needs satisfaction model (CASP-19). *Ageing Ment Health* 2003;**7**:186–  
48 194.  
49
- 50 23 Russell DW. UCLA Loneliness Scale (Version 3): reliability, validity, and factor structure. *J Pers Assess*  
51 1996;**66**:20–40. doi:10.1207/s15327752jpa6601\_2  
52
- 53
- 54
- 55
- 56
- 57
- 58
- 59
- 60

- 1  
2  
3 24 Steptoe A, Shankar A, Demakakos P, *et al.* Social isolation, loneliness, and all-cause mortality in older  
4 men and women. *Proc Natl Acad Sci U S A* 2013;**110**:5797–801. doi:10.1073/pnas.1219686110  
5  
6  
7 25 Banks J, Karlsen S, Oldfield Z. Socio-economic position. Published Online First:  
8 2003.<http://discovery.ucl.ac.uk/15366/1/15366.pdf> (accessed 4 Mar 2014).  
9  
10 26 Li J, Siegrist J. Physical activity and risk of cardiovascular disease--a meta-analysis of prospective cohort  
11 studies. *Int J Environ Res Public Health* 2012;**9**:391–407. doi:10.3390/ijerph9020391  
12  
13 27 Schuch FB, Vancampfort D, Richards J, *et al.* Exercise as a treatment for depression: A meta-analysis  
14 adjusting for publication bias. *J Psychiatr Res* 2016;**77**:42–51. doi:10.1016/j.jpsychires.2016.02.023  
15  
16 28 Stonerock GL, Hoffman BM, Smith PJ, *et al.* Exercise as Treatment for Anxiety: Systematic Review and  
17 Analysis. *Ann Behav Med Publ Soc Behav Med* 2015;**49**:542–56. doi:10.1007/s12160-014-9685-9  
18  
19 29 Smith L, Gardner B, Aggio D, *et al.* Association between participation in outdoor play and sport at  
20 10years old with physical activity in adulthood. *Prev Med* 2015;**74**:31–5.  
21 doi:10.1016/j.ypped.2015.02.004  
22  
23 30 Bassuk EL, Beardslee WR. Depression in homeless mothers: Addressing an unrecognized public health  
24 issue. *Am J Orthopsychiatry* 2014;**84**:73–81. doi:10.1037/h0098949  
25  
26  
27 31 Burcusa SL, Iacono WG. Risk for Recurrence in Depression. *Clin Psychol Rev* 2007;**27**:959–85.  
28 doi:10.1016/j.cpr.2007.02.005  
29  
30 32 Ruo B, Rumsfeld JS, Hlatky MA, *et al.* Depressive Symptoms and Health-Related Quality of Life: The  
31 Heart and Soul Study. *JAMA* 2003;**290**:215–21. doi:10.1001/jama.290.2.215  
32  
33 33 Cheung RC, Hanson AK, Maganti K, *et al.* Viral Hepatitis and Other Infectious Diseases in a Homeless  
34 Population. *J Clin Gastroenterol* 2002;**34**:476.  
35  
36 34 Feldmann J, Middleman AB. Homeless adolescents: Common clinical concerns. *Semin Pediatr Infect Dis*  
37 2003;**14**:6–11. doi:10.1053/spid.2003.127211  
38  
39 35 Spinelli MA, Ponath C, Tieu L, *et al.* Factors associated with substance use in older homeless adults:  
40 Results from the HOPE HOME study. *Subst Abuse* 2017;**38**:88–94. doi:10.1080/08897077.2016.1264534  
41  
42 36 Upshur CC, Jenkins D, Weinreb L, *et al.* Prevalence and predictors of substance use disorders among  
43 homeless women seeking primary care: An 11 site survey. *Am J Addict* 2017;**26**:680–8.  
44 doi:10.1111/ajad.12582  
45  
46  
47  
48  
49  
50  
51  
52  
53  
54  
55  
56  
57  
58  
59  
60

1  
2  
3  
4  
5  
6  
7  
8  
9  
10  
11  
12  
13  
14  
15  
16  
17  
18  
19  
20  
21  
22  
23  
24  
25  
26  
27  
28  
29  
30  
31  
32  
33  
34  
35  
36  
37  
38  
39  
40  
41  
42  
43  
44  
45  
46  
47  
48  
49  
50  
51  
52  
53  
54  
55  
56  
57  
58  
59  
60STROBE Statement—Checklist of items that should be included in reports of *cross-sectional studies*

|                           | Item No | Recommendation                                                                                                                                                                                               | Page No |
|---------------------------|---------|--------------------------------------------------------------------------------------------------------------------------------------------------------------------------------------------------------------|---------|
| <b>Title and abstract</b> | 1       | (a) Indicate the study's design with a commonly used term in the title or the abstract                                                                                                                       | 1-2     |
|                           |         | (b) Provide in the abstract an informative and balanced summary of what was done and what was found                                                                                                          | 2       |
| <b>Introduction</b>       |         |                                                                                                                                                                                                              |         |
| Background/rationale      | 2       | Explain the scientific background and rationale for the investigation being reported                                                                                                                         | 4       |
| Objectives                | 3       | State specific objectives, including any prespecified hypotheses                                                                                                                                             | 4-5     |
| <b>Methods</b>            |         |                                                                                                                                                                                                              |         |
| Study design              | 4       | Present key elements of study design early in the paper                                                                                                                                                      | 5       |
| Setting                   | 5       | Describe the setting, locations, and relevant dates, including periods of recruitment, exposure, follow-up, and data collection                                                                              | 5       |
| Participants              | 6       | (a) Give the eligibility criteria, and the sources and methods of selection of participants                                                                                                                  | 5       |
| Variables                 | 7       | Clearly define all outcomes, exposures, predictors, potential confounders, and effect modifiers. Give diagnostic criteria, if applicable                                                                     | 5-7     |
| Data sources/measurement  | 8*      | For each variable of interest, give sources of data and details of methods of assessment (measurement). Describe comparability of assessment methods if there is more than one group                         | 5-7     |
| Bias                      | 9       | Describe any efforts to address potential sources of bias                                                                                                                                                    | 5-7     |
| Study size                | 10      | Explain how the study size was arrived at                                                                                                                                                                    | 5       |
| Quantitative variables    | 11      | Explain how quantitative variables were handled in the analyses. If applicable, describe which groupings were chosen and why                                                                                 | 7-8     |
| Statistical methods       | 12      | (a) Describe all statistical methods, including those used to control for confounding                                                                                                                        | 7-8     |
|                           |         | (b) Describe any methods used to examine subgroups and interactions                                                                                                                                          | 7-8     |
|                           |         | (c) Explain how missing data were addressed                                                                                                                                                                  | 7-8     |
|                           |         | (d) If applicable, describe analytical methods taking account of sampling strategy                                                                                                                           | 7-8     |
|                           |         | (e) Describe any sensitivity analyses                                                                                                                                                                        | 7-8     |
| <b>Results</b>            |         |                                                                                                                                                                                                              |         |
| Participants              | 13*     | (a) Report numbers of individuals at each stage of study—eg numbers potentially eligible, examined for eligibility, confirmed eligible, included in the study, completing follow-up, and analysed            | 8-10    |
|                           |         | (b) Give reasons for non-participation at each stage                                                                                                                                                         | 8-10    |
|                           |         | (c) Consider use of a flow diagram                                                                                                                                                                           |         |
| Descriptive data          | 14*     | (a) Give characteristics of study participants (eg demographic, clinical, social) and information on exposures and potential confounders                                                                     | 8-10    |
|                           |         | (b) Indicate number of participants with missing data for each variable of interest                                                                                                                          | 8-10    |
| Outcome data              | 15*     | Report numbers of outcome events or summary measures                                                                                                                                                         | 8-10    |
| Main results              | 16      | (a) Give unadjusted estimates and, if applicable, confounder-adjusted estimates and their precision (eg, 95% confidence interval). Make clear which confounders were adjusted for and why they were included | 8-10    |

|                          |    |                                                                                                                                                                            |       |
|--------------------------|----|----------------------------------------------------------------------------------------------------------------------------------------------------------------------------|-------|
|                          |    | (b) Report category boundaries when continuous variables were categorized                                                                                                  | 8-10  |
|                          |    | (c) If relevant, consider translating estimates of relative risk into absolute risk for a meaningful time period                                                           | 8-10  |
| Other analyses           | 17 | Report other analyses done—eg analyses of subgroups and interactions, and sensitivity analyses                                                                             | 8-10  |
| <b>Discussion</b>        |    |                                                                                                                                                                            |       |
| Key results              | 18 | Summarise key results with reference to study objectives                                                                                                                   | 11    |
| Limitations              | 19 | Discuss limitations of the study, taking into account sources of potential bias or imprecision. Discuss both direction and magnitude of any potential bias                 | 12    |
| Interpretation           | 20 | Give a cautious overall interpretation of results considering objectives, limitations, multiplicity of analyses, results from similar studies, and other relevant evidence | 11-12 |
| Generalisability         | 21 | Discuss the generalisability (external validity) of the study results                                                                                                      | 11-12 |
| <b>Other information</b> |    |                                                                                                                                                                            |       |
| Funding                  | 22 | Give the source of funding and the role of the funders for the present study and, if applicable, for the original study on which the present article is based              | 13    |

\*Give information separately for exposed and unexposed groups.

**Note:** An Explanation and Elaboration article discusses each checklist item and gives methodological background and published examples of transparent reporting. The STROBE checklist is best used in conjunction with this article (freely available on the Web sites of PLoS Medicine at <http://www.plosmedicine.org/>, Annals of Internal Medicine at <http://www.annals.org/>, and Epidemiology at <http://www.epidem.com/>). Information on the STROBE Initiative is available at [www.strobe-statement.org](http://www.strobe-statement.org).

# BMJ Open

## Health behaviours and mental and physical health status in older adults with a history of homelessness: a cross-sectional population-based study in England

|                                 |                                                                                                                                                                                                                                                                                                                                                                                                                                                                                                                                                                                                                                                                                                                                                                                                                                                               |
|---------------------------------|---------------------------------------------------------------------------------------------------------------------------------------------------------------------------------------------------------------------------------------------------------------------------------------------------------------------------------------------------------------------------------------------------------------------------------------------------------------------------------------------------------------------------------------------------------------------------------------------------------------------------------------------------------------------------------------------------------------------------------------------------------------------------------------------------------------------------------------------------------------|
| Journal:                        | <i>BMJ Open</i>                                                                                                                                                                                                                                                                                                                                                                                                                                                                                                                                                                                                                                                                                                                                                                                                                                               |
| Manuscript ID                   | bmjopen-2018-028003.R2                                                                                                                                                                                                                                                                                                                                                                                                                                                                                                                                                                                                                                                                                                                                                                                                                                        |
| Article Type:                   | Research                                                                                                                                                                                                                                                                                                                                                                                                                                                                                                                                                                                                                                                                                                                                                                                                                                                      |
| Date Submitted by the Author:   | 19-Mar-2019                                                                                                                                                                                                                                                                                                                                                                                                                                                                                                                                                                                                                                                                                                                                                                                                                                                   |
| Complete List of Authors:       | Smith, Lee; Anglia Ruskin University, Department of Life Sciences<br>Veronese, Nicola; National Research Council, Neuroscience Institute, Aging Branch<br>López-Sánchez, Guillermo Felipe; Faculty of Sport Sciences, University of Murcia<br>Moller, Eloise ; The Single Homeless Project<br>Johnstone, James ; The Cambridge Centre for Sport and Exercise Sciences, Anglia Ruskin University<br>Firth, Joseph ; NICM Health Research Institute, Western Sydney University<br>Grabovac, Igor; Centre for Public Health, Medical University of Vienna, Department of Social and Preventive Medicine<br>Yang, Lin; Medical University of Vienna, Epidemiology<br>Soysal, Pinar; Faculty of Medicine, Bezmialem Vakif University, Department of Geriatric Medicine<br>Jackson, Sarah ; University College London, Department of Behavioural Science and Health |
| <b>Primary Subject Heading</b>: | Epidemiology                                                                                                                                                                                                                                                                                                                                                                                                                                                                                                                                                                                                                                                                                                                                                                                                                                                  |
| Secondary Subject Heading:      | Epidemiology                                                                                                                                                                                                                                                                                                                                                                                                                                                                                                                                                                                                                                                                                                                                                                                                                                                  |
| Keywords:                       | Homelessness, physical health, MENTAL HEALTH, health behaviour, older adults                                                                                                                                                                                                                                                                                                                                                                                                                                                                                                                                                                                                                                                                                                                                                                                  |
|                                 |                                                                                                                                                                                                                                                                                                                                                                                                                                                                                                                                                                                                                                                                                                                                                                                                                                                               |

SCHOLARONE™  
Manuscripts



# Health behaviours and mental and physical health status in older adults with a history of homelessness: a cross-sectional population-based study in England

Smith L,<sup>1\*</sup> Veronese N,<sup>2</sup> López-Sánchez GF,<sup>3</sup> Moller E,<sup>4</sup> Johnstone J,<sup>5</sup> Firth J,<sup>6</sup> Grabovac I,<sup>7</sup> Yang L,<sup>8</sup> Soysal P,<sup>9</sup> Jackson SE<sup>10\*</sup>

1. The Cambridge Centre for Sport and Exercise Sciences, Anglia Ruskin University, Cambridge. [Lee.Smith@anglia.ac.uk](mailto:Lee.Smith@anglia.ac.uk)
2. National Research Council, Neuroscience Institute, Aging Branch, Padova, Italy. [ilmannato@gmail.com](mailto:ilmannato@gmail.com)
3. Faculty of Sport Sciences, University of Murcia, Spain. [gfls@um.es](mailto:gfls@um.es)
4. The Single Homeless Project, UK, London. [Emoller@shp.org.uk](mailto:Emoller@shp.org.uk)
5. The Cambridge Centre for Sport and Exercise Sciences, Anglia Ruskin University, Cambridge. [james.johnstone@anglia.ac.uk](mailto:james.johnstone@anglia.ac.uk)
6. NICM Health Research Institute, Western Sydney University, Westmead, Australia. [j.firth@westernsydney.edu.au](mailto:j.firth@westernsydney.edu.au)
7. Department of Social and Preventive Medicine, Centre for Public Health, Medical University of Vienna, Vienna, Austria. [igor.grabovac@meduniwien.ac.at](mailto:igor.grabovac@meduniwien.ac.at)
8. Department of Epidemiology, Center for Public Health, Medical University of Vienna, Vienna, Austria. [Lin.yang@muv.ac.at](mailto:Lin.yang@muv.ac.at)
9. Department of Geriatric Medicine, Faculty of Medicine, Bezmialem Vakif University, Istanbul, Turkey. [dr.pinarsoysal@hotmail.com](mailto:dr.pinarsoysal@hotmail.com)
10. Department of Behavioural Science and Health, University College London, London, UK. [s.e.jackson@ucl.ac.uk](mailto:s.e.jackson@ucl.ac.uk)

**\*Corresponding authors:** Dr Sarah E Jackson, PhD. Department of Behavioural Science and Health, University College London, 1-19 Torrington Place, London WC1E 6BT [s.e.jackson@ucl.ac.uk](mailto:s.e.jackson@ucl.ac.uk); and Dr Lee Smith, PhD. Cambridge Centre for Sports and Exercise Sciences, Anglia Ruskin University, Cambridge [lee.smith@anglia.ac.uk](mailto:lee.smith@anglia.ac.uk)

**Word count (excluding title page, abstract, references, figures and tables):** 2726.

# Health behaviours and mental and physical health status in older adults with a history of homelessness: a cross-sectional population-based study in England

## ABSTRACT

**Objectives:** This study compared (i) levels of engagement in lifestyle risk behaviours and (ii) mental and physical health status in individuals who have previously been homeless to those of individuals who have not.

**Design:** Cross-sectional. **Participants:** Data were from participants (n=6,931) of the English Longitudinal Study of Ageing. **Measures:** Participants reported whether they had ever been homeless. We used regression models

to analyse associations between homelessness and (i) cigarette smoking, daily alcohol consumption and physical inactivity, adjusting for sociodemographic covariates (age, sex, ethnicity, highest level of education, marital status, and household non-pension wealth), and (ii) self-rated health, limiting long-standing illness, depressive symptoms, life satisfaction, quality of life and loneliness, adjusting for sociodemographics and health behaviours. **Results:** 104 participants (1.5%) reported having been homeless. Individuals who had been homeless were significantly more likely to be physically inactive (OR=1.62, 95% CI 1.44 to 2.52), report fair/bad/very bad self-rated health (OR=1.75, 95% CI 1.07 to 2.86), have a limiting long-standing illness (OR=2.66, 95% CI 1.65 to 4.30) and be depressed (OR=3.06, 95% CI 1.85 to 5.05), and scored lower on measures of life satisfaction (17.34 vs. 19.96,  $p<0.001$ ) and quality of life (39.02 vs. 41.21,  $p=0.013$ ). Rates of smoking (20.2% vs. 15.4%,  $p=0.436$ ), daily drinking (27.6% vs. 22.8%,  $p=0.385$ ), and loneliness (27.1% vs. 21.0%,  $p=0.080$ ) were also elevated. **Conclusions:** Those who were once homeless have poorer mental and physical health outcomes and are more likely to be physically inactive. Interventions to improve their health and quality of life are required.

**Keywords:** Homelessness, physical health, mental health, health behaviour, older adults.

### Strengths and limitations of this study

- To our knowledge, this is the first study to examine health outcomes in those who have transitioned out of homelessness.
- The very small number of participants with a history of homelessness in our sample meant that analyses were underpowered to detect modest differences between groups.
- However, the fact that we observed significant differences in the majority of the outcomes we analysed attests to the strength of these associations.
- Information on time since the period(s) of homelessness was not available so we were unable to evaluate the extent to which recency of homelessness is related to our outcomes of interest.
- Information on what way the participants were homeless (rough sleepers, statutory homeless families) was not available.

## INTRODUCTION

Homelessness is a substantial and growing problem in the United Kingdom. The annual homelessness monitor from Crisis and the Joseph Rowntree Foundation showed that in 2015/16 there were 271,000 local authority homelessness case actions in the UK, a rise of 32% since 2009/10.[1] Being homeless, or at risk of homelessness, has been shown to have a detrimental impact upon mental and physical health.[2] A recent systematic review concluded that people who are homeless are at increased risk of respiratory conditions, depression, anxiety, and excess winter mortality, compared with the general population.[3] Homelessness is associated with premature death, with the single homeless at the highest risk with an average age of death at 47 years, some 30 years lower than in the general population.[4] Moreover, the standardised mortality ratios reported for the homeless vary between studies and countries but are typically 2–5 times the age-standardised general population.[5]

Increased morbidity and mortality among the homeless may be driven, at least in part, by higher levels of engagement in lifestyle risk behaviours. Data from the USA indicate that while 19.8% of adult Americans smoke, smoking prevalence is over 70% among those who are homeless.[6–9] Levels of physical activity are also low among the homeless. In a Danish study, approximately 70% of homeless individuals reported no participation in any form of exercise.[10] High levels of alcohol consumption and drug use are also common among this population.[11]

Tackling homelessness is an urgent priority, and targeted policies have been actioned in the UK to rehouse those who are homeless. The Homelessness Directorate was established in 2002 in order to assist local authorities in tackling homelessness.[12] Strategies focus on preventing the need for people to sleep rough in the first place, as well as supporting people to move on from homelessness by helping them to address their needs, improving access to health and substance misuse services, and helping them rebuild their lives through education, training and employment.[13] A number of UK charities (e.g. Crisis, Shelter England, The Single Homeless Project) also work to support people who are homeless in acquiring a home and entering

1  
2  
3 back into employment. With such policies and charities in operation, a significant number of individuals are  
4 able to transition out of homelessness.  
5  
6

7 While the evidence base on the health risks associated with homelessness is growing, to our knowledge no  
8 studies have explored what happens to the health and wellbeing of people when they are no longer  
9 homeless. Given that lifestyle behaviours tend to track over the life course,[14] and early life exposures can  
10 have a substantial impact on later-life health outcomes,[15] it seems likely that the health risks associated  
11 with homelessness may persist, at least to some extent, beyond the period of homelessness. The present  
12 study aimed to investigate this through a comparison of (i) levels of engagement in lifestyle risk behaviours  
13 and (ii) mental and physical health status in individuals who have previously spent a period of time in their  
14 lives as homeless with those of individuals who have never been homeless, in a population-based sample of  
15 older adults living in England. Specifically, we aimed to address the following research questions:  
16  
17  
18  
19  
20  
21  
22

- 23 1. To what extent do individuals with a history of homelessness differ from those who have never  
24 been homeless with regard to smoking status, alcohol intake, and level of physical activity, adjusting  
25 for relevant sociodemographic characteristics?  
26  
27
- 28 2. To what extent do individuals with a history of homelessness differ from those who have never  
29 been homeless with regard to self-rated health, limiting long-standing illness, depressive symptoms,  
30 life satisfaction, quality of life, and loneliness, adjusting for relevant sociodemographic  
31 characteristics and health behaviours?  
32  
33  
34  
35

36 We hypothesised that individuals who had previously been homeless would have a higher prevalence of  
37 lifestyle risk behaviours and an unfavourable mental and physical health profile compared with those who  
38 had never been homeless.  
39  
40  
41  
42  
43  
44

## 45 **METHODS**

### 46 **Study population**

47  
48  
49 Data were from the English Longitudinal Study of Ageing (ELSA), a nationally-representative longitudinal  
50 panel study of men and women aged 50 and older living in households across England.[16] The study began  
51 in 2002, with subsequent rounds of data collection at two-year intervals via computer-assisted personal  
52  
53  
54  
55  
56  
57  
58  
59  
60

1  
2  
3 interview and self-completion questionnaires. Wave 3 (2006/07) included a life history questionnaire, which  
4 gathered detailed information about important events that occurred in the participants' lives, including  
5 whether they had ever been homeless. Of the 9,771 participants interviewed in Wave 3 of ELSA, 7,855  
6 (80.4%) completed the life history questionnaire. We excluded 924 participants (11.8%) with missing data  
7 on homelessness or sociodemographic covariates, leaving a final sample for analysis of 6,931 men and  
8 women. Ethical approval was obtained from the National Research Ethics Service and all participants gave  
9 full informed consent.  
10  
11  
12  
13  
14  
15

## 16 **Patient and Public Involvement**

17  
18 Patients were not involved in the design of this study.  
19  
20

## 21 **Measures**

### 22 History of homelessness

23  
24 Participants were asked whether they had ever been homeless for one month or more (yes/no).  
25  
26

### 27 Health behaviours

28  
29 Smoking status was assessed with the question "*Do you smoke cigarettes at all nowadays*" (yes/no).  
30  
31

32  
33 Frequency of alcohol intake over the past 12 months was reported on an 8-point scale from "not at all in the  
34 last 12 months" to "almost every day". We dichotomised responses to distinguish between participants  
35 drinking almost every day ("daily drinking") vs. less than this.  
36  
37

38  
39 Physical activity was assessed with three items that asked respondents about the frequency with which they  
40 took part in vigorous, moderate and low-intensity activities (more than once a week, once a week, 1-3 times  
41 a month, hardly ever/never)[17]. Responses were dichotomised as follows: inactive (no moderate/vigorous  
42 activity on a weekly basis) vs. active (moderate or vigorous activity at least once a week).  
43  
44  
45  
46  
47  
48

### 49 Health and wellbeing

50  
51  
52  
53  
54  
55  
56  
57  
58  
59  
60

1  
2  
3 Self-rated health was assessed using a single item: *“Would you say your health is... very*  
4 *good/good/fair/bad/very bad?”* We analysed the proportion of individuals rating their health as fair, bad or  
5 very bad, as is commonly done in analyses of this variable.[18,19]  
6  
7

8  
9 Limiting long-standing illness was assessed with two questions: (1) *“Do you have any long-standing illness,*  
10 *disability, or infirmity? By long-standing I mean anything that has troubled you over a period of time or that*  
11 *is likely to affect you over a period of time.”* If they responded yes, they were asked (2) *“Does this illness or*  
12 *disability limit your activities in any way?”* Affirmation of a long-standing illness and any form of limitation  
13 classified the participant as having a limiting long-standing illness.  
14  
15  
16

17  
18 Depressive symptoms were assessed with an eight-item version of the Center for Epidemiologic Studies  
19 Depression Scale (CES-D) [20], a scale highly validated for use in older adults [21]. This asks about feelings  
20 over the last week (e.g. *“Over the last week have you felt sad”*), with binary response options (1=yes, 0=no).  
21 Positively framed items were reverse scored. Data were dichotomised using an established cut-off, with a  
22 score of 4 or higher indicating significant symptomatology.[21]  
23  
24  
25  
26  
27

28 Life satisfaction was assessed with the Satisfaction With Life Scale,[22] which asks respondents to rate the  
29 extent to which they agree with five statements: *“In most ways my life is close to my ideal”*; *“The conditions*  
30 *of my life are excellent”*; *“I am satisfied with my life”*; *“So far I have got the important things I want in life”*;  
31 *“If I could live my life again, I would change almost nothing”* on a scale from 0 (strongly disagree) to 6  
32 (strongly agree). Responses are summed to produce a total score between 0 and 30, with higher scores  
33 indicating greater life satisfaction.  
34  
35  
36  
37  
38

39 Quality of life was assessed with the CASP-19,[23] a scale designed to measure quality of life in older  
40 people. Items cover four domains of quality of life; control (e.g. *“I feel that what happens to me is out of my*  
41 *control”*), autonomy (e.g. *“My health stops me from doing things I want to do”*), self-realisation (e.g. *“I feel*  
42 *that life is full of opportunities”*), and pleasure (e.g. *“I enjoy being in the company of others”*). Respondents  
43 are asked how often each statement applies to them (often=0, sometimes=1, not often=2, never=3).  
44 Positively-worded items are reverse scored so that a higher total score indicates higher quality of life (range:  
45 0–57).  
46  
47  
48  
49  
50  
51

52 Loneliness was measured using a three-item short form of the Revised University of California Los Angeles  
53 (UCLA) Loneliness Scale.[24] Participants were asked: *“How often do you feel you lack*  
54 *companionship?”* (hardly ever or never=1, some of the time=2, often=3). Scores ranged from 3 to 9, with  
55  
56  
57  
58  
59  
60

1  
2  
3 higher scores indicating greater loneliness. They were dichotomised at  $\geq 6$  versus  $< 6$  to indicate high versus  
4 low loneliness.[25]

#### 6 Sociodemographic covariates

7  
8  
9  
10 Interviewers collected information on age, sex, ethnicity, the highest level of education, marital status and  
11 wealth. For these analyses, ethnicity was categorised as white or non-white. We classified education as low  
12 (no formal qualifications), intermediate (up to degree) or high (degree or higher). Marital status was  
13 categorised as married or unmarried (never married, divorced or widowed). Wealth was categorised into  
14 five equal groups of net total non-pension wealth measured at the benefit unit level (a benefit unit is a  
15 couple or single person along with any dependent children they might have) across all ELSA participants  
16 who took part in Wave 3. Wealth has been identified as a particularly appropriate indicator of SES in this  
17 age group.[26]

#### 27 **Statistical analysis**

28  
29  
30 All analyses were conducted using SPSS version 24. Data were weighted to correct for sampling probabilities  
31 and for differential non-response and to calibrate back to the 2011 National Census population distributions  
32 for age and sex. The weights accounted for the differential probability of being included in Wave 3 of ELSA  
33 and for non-response to the life history interview.

34  
35  
36  
37  
38 Differences in sociodemographic characteristics of the groups who did and did not report a history of  
39 homelessness were tested using independent t-tests for continuous variables and Pearson's chi-square tests  
40 for categorical variables. We used binary logistic regression to analyse associations between history of  
41 homelessness and cigarette smoking, daily drinking and physical inactivity, adjusting for sociodemographic  
42 covariates. We then used linear regression (for continuous outcomes) and binary logistic regression (for  
43 categorical outcomes) to analyse associations between history of homelessness and health and wellbeing,  
44 adjusting for sociodemographics and health behaviours. In all models, the reference category was the group  
45 without a history of homelessness. A  $p$ -value  $< 0.05$  was used to indicate statistical significance.

## 52 **RESULTS**



## Sample characteristics

Of the 6,931 participants in our sample, 104 (1.5%) reported having been homeless for one month or more and 6,827 (98.5%) had never been homeless for one month or more. Sample characteristics in relation to history of homelessness are summarised in Table 1. On average, participants who had been homeless were significantly younger than those who had not been homeless (60.9 vs. 65.7 years) and a greater proportion were non-white (6.6% vs. 3.1%), unmarried (54.3% vs. 33.8%) and from the lowest quintile of wealth (44.3% vs. 18.9%). A marginally higher proportion of the group who had been homeless were male (53.8% vs. 46.7%) although the difference was not statistically significant ( $p=0.149$ ). There was no significant difference between groups in the highest level of education achieved.

**Table 1** Sample characteristics in relation to history of homelessness

|                            | Had not been<br>homeless<br>( <i>n</i> =6,827) <sup>1</sup> | Had been<br>homeless<br>( <i>n</i> =104) | <i>p</i> |
|----------------------------|-------------------------------------------------------------|------------------------------------------|----------|
| Age (years), mean (SD)     | 65.74 (10.64)                                               | 60.94 (8.32)                             | <0.001   |
| Sex                        |                                                             |                                          |          |
| Men                        | 46.7                                                        | 53.8                                     | 0.149    |
| Women                      | 53.3                                                        | 46.2                                     | -        |
| Ethnicity                  |                                                             |                                          |          |
| White                      | 96.9                                                        | 93.4                                     | 0.042    |
| Non-white                  | 3.1                                                         | 6.6                                      | -        |
| Highest level of education |                                                             |                                          |          |
| No qualifications          | 32.4                                                        | 27.4                                     | 0.541    |
| Below degree               | 52.2                                                        | 56.6                                     | -        |
| Degree or higher           | 15.5                                                        | 16.0                                     | -        |
| Marital status             |                                                             |                                          |          |
| Married                    | 66.2                                                        | 45.7                                     | <0.001   |
| Unmarried                  | 33.8                                                        | 54.3                                     | -        |
| Wealth quintile            |                                                             |                                          |          |
| 1 (poorest)                | 18.9                                                        | 44.3                                     | <0.001   |

|             |      |      |   |
|-------------|------|------|---|
| 2           | 19.5 | 13.2 | - |
| 3           | 20.6 | 14.2 | - |
| 4           | 20.0 | 16.0 | - |
| 5 (richest) | 21.0 | 12.3 | - |

<sup>1</sup> Unweighted sample sizes.

All figures are weighted for sampling probabilities and differential non-response.

Values are percentages unless otherwise stated.

SD = standard deviation.

## History of homelessness and health behaviours

Associations between history of homelessness and health behaviours are shown in Table 2. After adjustment for age, sex, ethnicity, education, marital status and wealth, participants who had been homeless had 1.62 times higher odds (95% CI 1.44 to 2.52) of being inactive than those who had not been homeless (30.7% vs. 23.0%,  $p=0.031$ ). Rates of smoking (20.2% vs. 15.4%) and daily drinking (27.6% vs. 22.8%) were also higher in the group who had been homeless, but differences were not statistically significant.

**Table 2** Associations between history of homelessness and health behaviours

|                     | Had not been homeless | Had been homeless | <i>p</i> |
|---------------------|-----------------------|-------------------|----------|
| Smoking             |                       |                   |          |
| % (SE)              | 15.4 (0.4)            | 20.2 (3.3)        | -        |
| OR [95% CI]         | 1.00 (Ref)            | 1.21 [0.75; 1.94] | 0.436    |
| Daily drinking      |                       |                   |          |
| % (SE)              | 22.8 (0.5)            | 27.6 (4.2)        | -        |
| OR [95% CI]         | 1.00 (Ref)            | 1.31 [0.77; 2.21] | 0.321    |
| Physical inactivity |                       |                   |          |
| % (SE)              | 23.0 (0.5)            | 30.7 (3.7)        | -        |
| OR [95% CI]         | 1.00 (Ref)            | 1.62 [1.04; 2.52] | 0.031    |

All figures are weighted for sampling probabilities and differential non-response, and are adjusted for age, sex, ethnicity, education, marital status and wealth.

SE = standard error, OR = odds ratio, CI = confidence interval.

## History of homelessness and health and wellbeing

Associations between history of homelessness and health and wellbeing are summarised in Table 3. After adjustment for sociodemographics and health behaviours, compared with the group who had not been homeless, the group who had been homeless had 1.75 times higher odds (95% CI 1.07 to 2.86) of reporting fair/bad/very bad self-rated health (41.9% vs. 30.5%,  $p=0.025$ ), 2.66 times higher odds (95% CI 1.65 to 4.30) of reporting a limiting long-standing illness (55.8% vs. 33.5%,  $p<0.001$ ) and 3.06 times higher odds (95% CI 1.85 to 5.05) of depressive symptoms (33.3% vs. 13.0%,  $p<0.001$ ). The group who had been homeless also scored lower on average on measures of life satisfaction (17.34 vs. 19.96,  $p<0.001$ ) and quality of life (39.02 vs. 41.21,  $p=0.013$ ). The rate of loneliness (27.1% vs. 21.0%) was higher in the group who had been homeless but this difference did not reach statistical significance ( $p=0.110$ ).

**Table 3** Associations between history of homelessness and health and wellbeing

|                                     | Had not been homeless | Had been homeless    | <i>p</i> |
|-------------------------------------|-----------------------|----------------------|----------|
| Fair/bad/very bad self-rated health |                       |                      |          |
| % (SE)                              | 30.5 (0.6)            | 41.9 (4.5)           | -        |
| OR [95% CI]                         | 1.00 (Ref)            | 1.75 [1.07; 2.86]    | 0.025    |
| Limiting long-standing illness      |                       |                      |          |
| % (SE)                              | 33.5 (0.6)            | 55.8 (4.7)           | -        |
| OR [95% CI]                         | 1.00 (Ref)            | 2.66 [1.65; 4.30]    | <0.001   |
| Depressive symptoms above threshold |                       |                      |          |
| % (SE)                              | 13.0 (0.4)            | 33.3 (3.5)           | -        |
| OR [95% CI]                         | 1.00 (Ref)            | 3.06 [1.85; 5.05]    | <0.001   |
| Life satisfaction                   |                       |                      |          |
| Mean score (SE)                     | 19.96 (0.1)           | 17.34 (0.7)          | -        |
| Coeff. [95% CI]                     | Ref                   | -2.78 [-4.18; -1.37] | <0.001   |
| Quality of life                     |                       |                      |          |
| Mean score (SE)                     | 41.21 (0.1)           | 39.02 (0.9)          | -        |
| Coeff. [95% CI]                     | Ref                   | -2.25 [-4.03; -0.47] | 0.013    |
| High loneliness                     |                       |                      |          |
| % (SE)                              | 21.0 (0.5)            | 27.1 (4.2)           | -        |
| OR [95% CI]                         | 1.00 (Ref)            | 1.50 [0.91; 2.47]    | 0.110    |

All figures are weighted for sampling probabilities and differential non-response and adjusted for age, sex, ethnicity, education, marital status, wealth, smoking status, alcohol intake and physical activity.

SE = standard error, OR = odds ratio, CI = confidence interval, Coeff = coefficient. Possible scores on the quality of life scale range from 0-57, and on life satisfaction scale range from 0-30.

---

## DISCUSSION

In the present analyses, a total of 104 participants reported having been homeless for one month or more. Those who reported a history of homelessness had significantly higher odds of physical inactivity than those who had not been homeless and were more likely to smoke and drink daily but these did not reach significance. Importantly, those who had reported being homeless had a higher odds of reporting fair/bad/very bad self-rated health, limiting long-standing illness and depressive symptoms and scored lower on measures of life satisfaction and quality of life. Taken together, these data suggest that people who transition out of homelessness may be at increased risk of partaking in unhealthy behaviour and suffer poorer mental and physical health.

The finding that those who were previously homeless were more likely to be inactive than those who were not is of importance. Indeed, sustained and regular participation in physical activity can aid in the prevention against, and improve the profile of, non-communicable diseases – including those in relation to both physical (e.g. cardio respiratory; [27]) and mental (e.g. anxiety and depression; [28,29]) health, both of which are common in homeless populations [3]. Moreover, similar health profiles were observed in the present manuscript in a population who has transitioned from homelessness. Literature suggests that levels of physical activity track across the life course [30]. Importantly, those who are homeless have critically low levels of physical activity. For example, in a Danish study, approximately 70% of the homeless reported no participation in any form of exercise [10]. This low level of physical activity is potentially tracking through the transition from homelessness.

The novel finding that people who have ever been homeless are at increased risk of adverse physical and mental health outcomes is important. This suggests that the transition from homelessness is not enough to bring the health profile of this population in alignment with the general public. There are several factors that may account for the observed disparity in health. First, depression is prevalent among the homeless community [31] and is a highly recurrent disorder, [32] thus is likely to reoccur after the transition out of homelessness, with significant personal consequences.[32] Low mood may be partly driving the observed negative associations with life satisfaction, quality of life, and limiting-long standing illness. [33]

Second, people who are homeless are susceptible to multiple health complications. Chronic hepatitis C and co-infections are common among the homeless population.[34] Other conditions that are prevalent among

1  
2  
3 the homeless include tuberculosis, uncontrolled asthma, and dermatologic infestations.[35] These problems  
4 are compounded by high rates of drug and alcohol abuse and together likely contribute to poorer self-rated  
5 health, limiting-long standing illness and lower quality of life across the lifespan.[36,37]  
6  
7

8  
9 Interestingly, while differences in health outcomes (self-rated health, limiting long-standing illness,  
10 depressive symptoms, life satisfaction and QOL) between the present sample (ex homeless) and those who  
11 have not been homeless were significant, the magnitude of the associations was smaller than has been  
12 documented in previous studies [38]. This may be owing to a degree of 'recovery' from homelessness. It  
13 may also be an artefact of the type of homelessness. The majority of the present sample who had  
14 experienced homelessness may have been "statutory homeless" where health outcomes are likely better  
15 than rough sleeping.  
16  
17  
18  
19  
20  
21

22 To our knowledge, this is the first study to examine health outcomes in those who have transitioned out of  
23 homelessness. While these findings are important for advancing the evidence base in this area, they should  
24 be considered in light of a couple of limitations. The very small number of participants with a history of  
25 homelessness in our sample meant that analyses were underpowered to detect modest differences  
26 between groups. However, the fact that we observed significant differences in the majority of the outcomes  
27 we analysed attests to the strength of these associations. Nevertheless, future research using larger  
28 samples is required to confirm or refute our findings. While we adjusted for a wide range of  
29 sociodemographic and behavioural covariates, it is possible that the results could be explained by residual  
30 confounding by unmeasured variables – i.e. the group reporting a history of homelessness were deprived in  
31 ways that were not reflected in the existing variables. Information on time since the period(s) of  
32 homelessness was not available so we were unable to evaluate the extent to which recency of  
33 homelessness is related to our outcomes of interest. It is possible that participants who reported a history  
34 of homelessness had transitioned out of homelessness many years or even decades prior. In addition,  
35 information on type of homelessness was not available. It is therefore unknown whether those who  
36 reported once being homeless were "statutory homeless", lived on the streets, stayed in a shelter,  
37 abandoned building or vehicle, etc. Type of homelessness may have varying influences on health and  
38 behaviour. It is plausible to assume that those who are rough sleepers (living on streets, abandoned  
39 buildings or vehicles) are at a higher risk of poor health, for example, owing to exposure to cold weather  
40 and wet conditions or lack of access to essential facilities such as bathrooms. However, those who are rough  
41 sleepers are much more likely to be male (86% male) [1] and a relatively large proportion of our sample who  
42 were once homeless were female (46.7%). It may be that the present sample are not representative of the  
43  
44  
45  
46  
47  
48  
49  
50  
51  
52  
53  
54  
55  
56  
57  
58  
59  
60

1  
2  
3 wider homeless population (or at least rough sleepers) in the UK. Future research to tease out the influence  
4 of type of previous homelessness on health/ behaviour outcomes is required. Finally, ELSA does not collect  
5 data on those currently homeless and thus it was not possible to have a “currently homeless” category in  
6 the present analyses. Given that we did not observe significant differences in some outcomes previously  
7 demonstrated to differ between currently homeless and housed populations (e.g. smoking), it might be the  
8 case that those who manage to transition out of homelessness are able to offset some of the increased risk  
9 associated with having been homeless. Future research may wish to compare those never homeless, those  
10 currently homeless, and those previously homeless to gain a deeper insight.

## 17 CONCLUSION

18  
19  
20 In conclusion, the present results indicate that older adults in England who have previously been homeless  
21 are more likely to be physically inactive and have poorer mental and physical health outcomes than those  
22 who have never been homeless.

23  
24  
25  
26 Continued initiatives to tackle homelessness itself is important. It is also crucial to consider that even those  
27 who have transitioned from homelessness continue to be at much higher risk of poor health and wellbeing.  
28 Therefore, continued monitoring and targeted interventions are required to improve health outcomes and  
29 quality of life in this population. Such interventions may wish to consider lifestyle risk behaviours to improve  
30 mental and physical health status.

31  
32  
33  
34  
35  
36  
37  
38  
39 **Authors Contributions:** Study concept and design: LS and SEJ. Analysis and interpretation of data: LS and SEJ.

40  
41 Drafting of the manuscript: LS, NV, GFLS, EM, JJ, JF, IG, LY, PS, SEJ. Critical revision of the manuscript for  
42 important intellectual content: LS, NV, GFLS, EM, JJ, JF, IG, LY, PS, SEJ.

43  
44  
45  
46 **Conflicts of Interest:** None declared.

47  
48  
49 **Funding:** This research did not receive any funding from agencies in the public, commercial, or not-for-profit  
50 sectors.

51  
52  
53 **Ethics:** Ethical approval was obtained from the National Research Ethics Service and all participants gave full  
54 informed consent.

**Data sharing:** No additional data available.

## REFERENCES

- 1 Fitzpatrick S, Pawson H, Bramley G, *et al*. The homelessness monitor: England 2017. Institute for Social Policy, Environment and Real Estate (I-SPHERE), Heriot-Watt University; City Futures Research Centre, University of New South Wales 2017.
- 2 Adebowale V. There is no excuse for homelessness in Britain in 2018. *BMJ* 2018;**360**:k902. doi:10.1136/bmj.k902
- 3 Thomson H, Thomas S, Sellstrom E, *et al*. Housing improvements for health and associated socio-economic outcomes. *Cochrane Database Syst Rev* 2013;:CD008657. doi:10.1002/14651858.CD008657.pub2
- 4 Homelessness: A Silent Killer (2011). Crisis. <https://www.crisis.org.uk/ending-homelessness/homelessness-knowledge-hub/health-and-wellbeing/homelessness-a-silent-killer-2011/> (accessed 11 Oct 2018).
- 5 Fazel S, Geddes JR, Kushel M. The health of homeless people in high-income countries: descriptive epidemiology, health consequences, and clinical and policy recommendations. *The Lancet* 2014;**384**:1529–40. doi:10.1016/S0140-6736(14)61132-6
- 6 Kermode M, Crofts N, Miller P, *et al*. Health indicators and risks among people experiencing homelessness in Melbourne, 1995-1996. *Aust N Z J Public Health* 1998;**22**:464–70.
- 7 Fischer PJ, Breakey WR. The epidemiology of alcohol, drug, and mental disorders among homeless persons. *Am Psychol* 1991;**46**:1115–28.
- 8 Connor SE, Cook RL, Herbert MI, *et al*. Smoking cessation in a homeless population: there is a will, but is there a way? *J Gen Intern Med* 2002;**17**:369–72.
- 9 Centers for Disease Control and Prevention (CDC). Cigarette smoking among adults--United States, 2007. *MMWR Morb Mortal Wkly Rep* 2008;**57**:1221–6.
- 10 Pedersen P, Christensen AI, Hess U, *et al*. Susydsat-sundhedsprofil for social udsatte I Danmark 2007. Copenhagen: : Radet for socialt udsatte 2008.
- 11 O'Toole TP, Gibbon JL, Hanusa BH, *et al*. Self-Reported Changes in Drug and Alcohol Use After Becoming Homeless. *Am J Public Health* 2004;**94**:830–5. doi:10.2105/AJPH.94.5.830
- 12 Office of the Deputy Prime Minister. Select Committee on Office of the Deputy Prime Minister: Housing, Planning, Local Government and the Regions Written Evidence: Memorandum by the Office of the Deputy Prime Minister (HOM 53). 2004.<https://publications.parliament.uk/pa/cm200304/cmselect/cmodpm/1116/1116we56.htm> (accessed 11 Oct 2018).

- 1  
2  
3 13 Jones A, Pleace N. Review of single homelessness in the uk 2000-2010. Br. Libr.  
4 2010.<http://www.bl.uk/collection-items/review-of-single-homelessness-in-the-uk-20002010> (accessed  
5 11 Oct 2018).  
6  
7 14 Malina RM. Tracking of physical activity and physical fitness across the lifespan. *Res Q Exerc Sport*  
8 1996;**67**:S48-57.  
9  
10 15 Ben-Shlomo Y, Mishra G, Kuh D. Life Course Epidemiology. In: Ahrens W, Pigeot I, eds. *Handbook of*  
11 *Epidemiology*. New York, NY: : Springer New York 2014. 1521–49. doi:10.1007/978-0-387-09834-0\_56  
12  
13 16 Steptoe A, Breeze E, Banks J, *et al*. Cohort profile: the English Longitudinal Study of Ageing. *Int J*  
14 *Epidemiol* 2013;**42**:1640–8. doi:10.1093/ije/dys168  
15  
16 17 Demakakos P, Hamer M, Stamatakis E, *et al*. Low-intensity physical activity is associated with reduced  
17 risk of incident type 2 diabetes in older adults: evidence from the English Longitudinal Study of Ageing.  
18 *Diabetologia* 2010;**53**:1877–85. doi:10.1007/s00125-010-1785-x  
19  
20 18 Steptoe A, Jackson SE. The Life Skills of Older Americans: Association with Economic, Psychological,  
21 Social, and Health Outcomes. *Sci Rep* 2018;**8**:9669. doi:10.1038/s41598-018-27909-w  
22  
23 19 DeSalvo KB, Bloser N, Reynolds K, *et al*. Mortality prediction with a single general self-rated health  
24 question. A meta-analysis. *J Gen Intern Med* 2006;**21**:267–75. doi:10.1111/j.1525-1497.2005.00291.x  
25  
26 20 Radloff LS. The CES-D scale. *Appl Psychol Meas* 1977;**1**:385–401.  
27  
28 21 Steffick DE. Documentation of affective functioning measures in the Health and Retirement Study.  
29 2000.  
30  
31 22 Diener E, Emmons RA, Larsen RJ, *et al*. The satisfaction with life scale. *J Assess* 1985;**49**:71–75.  
32  
33 23 Hyde M, Wiggins RD, Higgs P, *et al*. A measure of quality of life in early old age: the theory,  
34 development and properties of a needs satisfaction model (CASP-19). *Ageing Ment Health* 2003;**7**:186–  
35 194.  
36  
37 24 Russell DW. UCLA Loneliness Scale (Version 3): reliability, validity, and factor structure. *J Pers Assess*  
38 1996;**66**:20–40. doi:10.1207/s15327752jpa6601\_2  
39  
40 25 Steptoe A, Shankar A, Demakakos P, *et al*. Social isolation, loneliness, and all-cause mortality in older  
41 men and women. *Proc Natl Acad Sci U S A* 2013;**110**:5797–801. doi:10.1073/pnas.1219686110  
42  
43 26 Banks J, Karlsen S, Oldfield Z. Socio-economic position. Published Online First:  
44 2003.<http://discovery.ucl.ac.uk/15366/1/15366.pdf> (accessed 4 Mar 2014).  
45  
46 27 Li J, Siegrist J. Physical activity and risk of cardiovascular disease--a meta-analysis of prospective cohort  
47 studies. *Int J Environ Res Public Health* 2012;**9**:391–407. doi:10.3390/ijerph9020391  
48  
49 28 Schuch FB, Vancampfort D, Richards J, *et al*. Exercise as a treatment for depression: A meta-analysis  
50 adjusting for publication bias. *J Psychiatr Res* 2016;**77**:42–51. doi:10.1016/j.jpsychires.2016.02.023  
51  
52  
53  
54  
55  
56  
57  
58  
59  
60



- 1  
2  
3 29 Stonerock GL, Hoffman BM, Smith PJ, *et al.* Exercise as Treatment for Anxiety: Systematic Review and  
4 Analysis. *Ann Behav Med Publ Soc Behav Med* 2015;**49**:542–56. doi:10.1007/s12160-014-9685-9  
5  
6 30 Smith L, Gardner B, Aggio D, *et al.* Association between participation in outdoor play and sport at  
7 10years old with physical activity in adulthood. *Prev Med* 2015;**74**:31–5.  
8 doi:10.1016/j.ypmed.2015.02.004  
9  
10 31 Bassuk EL, Beardslee WR. Depression in homeless mothers: Addressing an unrecognized public health  
11 issue. *Am J Orthopsychiatry* 2014;**84**:73–81. doi:10.1037/h0098949  
12  
13 32 Burcusa SL, Iacono WG. Risk for Recurrence in Depression. *Clin Psychol Rev* 2007;**27**:959–85.  
14 doi:10.1016/j.cpr.2007.02.005  
15  
16 33 Ruo B, Rumsfeld JS, Hlatky MA, *et al.* Depressive Symptoms and Health-Related Quality of Life: The  
17 Heart and Soul Study. *JAMA* 2003;**290**:215–21. doi:10.1001/jama.290.2.215  
18  
19 34 Cheung RC, Hanson AK, Maganti K, *et al.* Viral Hepatitis and Other Infectious Diseases in a Homeless  
20 Population. *J Clin Gastroenterol* 2002;**34**:476.  
21  
22 35 Feldmann J, Middleman AB. Homeless adolescents: Common clinical concerns. *Semin Pediatr Infect Dis*  
23 2003;**14**:6–11. doi:10.1053/spid.2003.127211  
24  
25 36 Spinelli MA, Ponath C, Tieu L, *et al.* Factors associated with substance use in older homeless adults:  
26 Results from the HOPE HOME study. *Subst Abuse* 2017;**38**:88–94. doi:10.1080/08897077.2016.1264534  
27  
28 37 Upshur CC, Jenkins D, Weinreb L, *et al.* Prevalence and predictors of substance use disorders among  
29 homeless women seeking primary care: An 11 site survey. *Am J Addict* 2017;**26**:680–8.  
30 doi:10.1111/ajad.12582  
31  
32 38 Munoz RT, Hellman CM, Buster B, *et al.* Life Satisfaction, Hope, and Positive Emotions as Antecedents of  
33 Health Related Quality of Life Among Homeless Individuals. *Int J Appl Posit Psychol* 2016;**1**:69–89.  
34 doi:10.1007/s41042-017-0005-z  
35  
36  
37  
38  
39  
40  
41  
42  
43  
44  
45  
46  
47  
48  
49  
50  
51  
52  
53  
54  
55  
56  
57  
58  
59  
60

STROBE Statement—Checklist of items that should be included in reports of *cross-sectional studies*

|                           | Item No | Recommendation                                                                                                                                                                                               | Page No |
|---------------------------|---------|--------------------------------------------------------------------------------------------------------------------------------------------------------------------------------------------------------------|---------|
| <b>Title and abstract</b> | 1       | (a) Indicate the study's design with a commonly used term in the title or the abstract                                                                                                                       | 1-2     |
|                           |         | (b) Provide in the abstract an informative and balanced summary of what was done and what was found                                                                                                          | 2       |
| <b>Introduction</b>       |         |                                                                                                                                                                                                              |         |
| Background/rationale      | 2       | Explain the scientific background and rationale for the investigation being reported                                                                                                                         | 4       |
| Objectives                | 3       | State specific objectives, including any prespecified hypotheses                                                                                                                                             | 4-5     |
| <b>Methods</b>            |         |                                                                                                                                                                                                              |         |
| Study design              | 4       | Present key elements of study design early in the paper                                                                                                                                                      | 5       |
| Setting                   | 5       | Describe the setting, locations, and relevant dates, including periods of recruitment, exposure, follow-up, and data collection                                                                              | 5       |
| Participants              | 6       | (a) Give the eligibility criteria, and the sources and methods of selection of participants                                                                                                                  | 5       |
| Variables                 | 7       | Clearly define all outcomes, exposures, predictors, potential confounders, and effect modifiers. Give diagnostic criteria, if applicable                                                                     | 5-7     |
| Data sources/measurement  | 8*      | For each variable of interest, give sources of data and details of methods of assessment (measurement). Describe comparability of assessment methods if there is more than one group                         | 5-7     |
| Bias                      | 9       | Describe any efforts to address potential sources of bias                                                                                                                                                    | 5-7     |
| Study size                | 10      | Explain how the study size was arrived at                                                                                                                                                                    | 5       |
| Quantitative variables    | 11      | Explain how quantitative variables were handled in the analyses. If applicable, describe which groupings were chosen and why                                                                                 | 7-8     |
| Statistical methods       | 12      | (a) Describe all statistical methods, including those used to control for confounding                                                                                                                        | 7-8     |
|                           |         | (b) Describe any methods used to examine subgroups and interactions                                                                                                                                          | 7-8     |
|                           |         | (c) Explain how missing data were addressed                                                                                                                                                                  | 7-8     |
|                           |         | (d) If applicable, describe analytical methods taking account of sampling strategy                                                                                                                           | 7-8     |
|                           |         | (e) Describe any sensitivity analyses                                                                                                                                                                        | 7-8     |
| <b>Results</b>            |         |                                                                                                                                                                                                              |         |
| Participants              | 13*     | (a) Report numbers of individuals at each stage of study—eg numbers potentially eligible, examined for eligibility, confirmed eligible, included in the study, completing follow-up, and analysed            | 8-10    |
|                           |         | (b) Give reasons for non-participation at each stage                                                                                                                                                         | 8-10    |
|                           |         | (c) Consider use of a flow diagram                                                                                                                                                                           |         |
| Descriptive data          | 14*     | (a) Give characteristics of study participants (eg demographic, clinical, social) and information on exposures and potential confounders                                                                     | 8-10    |
|                           |         | (b) Indicate number of participants with missing data for each variable of interest                                                                                                                          | 8-10    |
| Outcome data              | 15*     | Report numbers of outcome events or summary measures                                                                                                                                                         | 8-10    |
| Main results              | 16      | (a) Give unadjusted estimates and, if applicable, confounder-adjusted estimates and their precision (eg, 95% confidence interval). Make clear which confounders were adjusted for and why they were included | 8-10    |

|                          |    |                                                                                                                                                                            |       |
|--------------------------|----|----------------------------------------------------------------------------------------------------------------------------------------------------------------------------|-------|
|                          |    | (b) Report category boundaries when continuous variables were categorized                                                                                                  | 8-10  |
|                          |    | (c) If relevant, consider translating estimates of relative risk into absolute risk for a meaningful time period                                                           | 8-10  |
| Other analyses           | 17 | Report other analyses done—eg analyses of subgroups and interactions, and sensitivity analyses                                                                             | 8-10  |
| <b>Discussion</b>        |    |                                                                                                                                                                            |       |
| Key results              | 18 | Summarise key results with reference to study objectives                                                                                                                   | 11    |
| Limitations              | 19 | Discuss limitations of the study, taking into account sources of potential bias or imprecision. Discuss both direction and magnitude of any potential bias                 | 12    |
| Interpretation           | 20 | Give a cautious overall interpretation of results considering objectives, limitations, multiplicity of analyses, results from similar studies, and other relevant evidence | 11-12 |
| Generalisability         | 21 | Discuss the generalisability (external validity) of the study results                                                                                                      | 11-12 |
| <b>Other information</b> |    |                                                                                                                                                                            |       |
| Funding                  | 22 | Give the source of funding and the role of the funders for the present study and, if applicable, for the original study on which the present article is based              | 13    |

\*Give information separately for exposed and unexposed groups.

**Note:** An Explanation and Elaboration article discusses each checklist item and gives methodological background and published examples of transparent reporting. The STROBE checklist is best used in conjunction with this article (freely available on the Web sites of PLoS Medicine at <http://www.plosmedicine.org/>, Annals of Internal Medicine at <http://www.annals.org/>, and Epidemiology at <http://www.epidem.com/>). Information on the STROBE Initiative is available at [www.strobe-statement.org](http://www.strobe-statement.org).
